# Supplementary material for: Self-assembled dimethyldihydropyrene-pyridyl substituted ligands with zinc(ii) meso-tetraphenylporphyrin via axial coordination
Source: Royal Society of Chemistry journal article supplement (doi:10.1039/c6dt02975b), 2016-01-01
Supplement: c6dt02975b1.pdf [file c6dt02975b1.pdf]

Electronic Supplementary Information (ESI) for

**Self-assembled dimethyldihydropyrene-pyridyl substituted ligands  
with zinc (II) *meso*-tetraphenylporphyrin *via* axial coordination**

A. Bakkar, S. Cobo,\* F. Lajolet, M. Boggio-Pasqua, G. Royal, E. Saint Aman\*

E-mail: saioa.cobo@ujf-grenoble.fr

**Contents**

**Table of contents:**

- 1. Additional NMR spectra**
- 2. Binding constants**
- 3. Crystal data**
- 4. TD-DFT values**
- 5. Photo-isomerisation quantum yield**

# 1. Additional NMR spectra

Figure ESI 1 :  $^1\text{H}$  NMR spectrum of  $2_c$

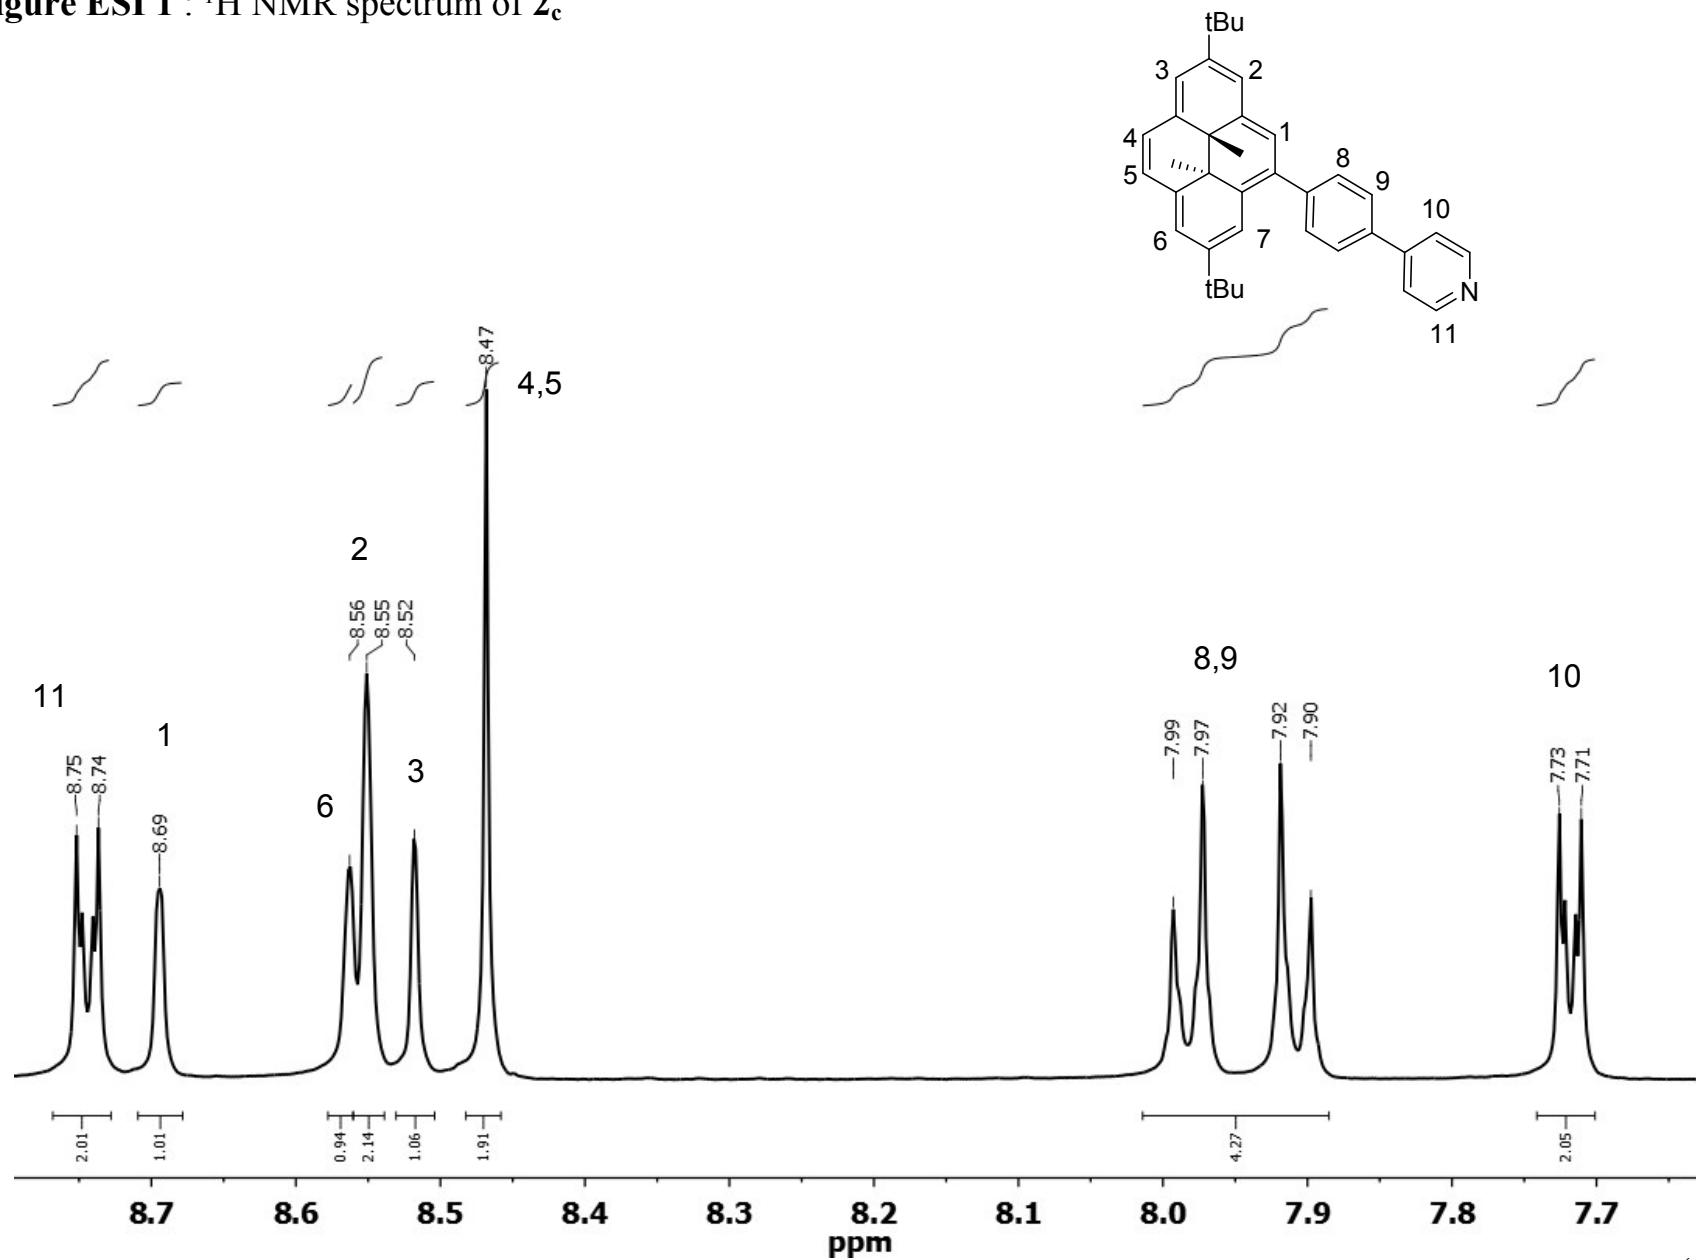

Figure ESI 2 :  $^1\text{H}$  NMR spectrum of  $3_c^+$

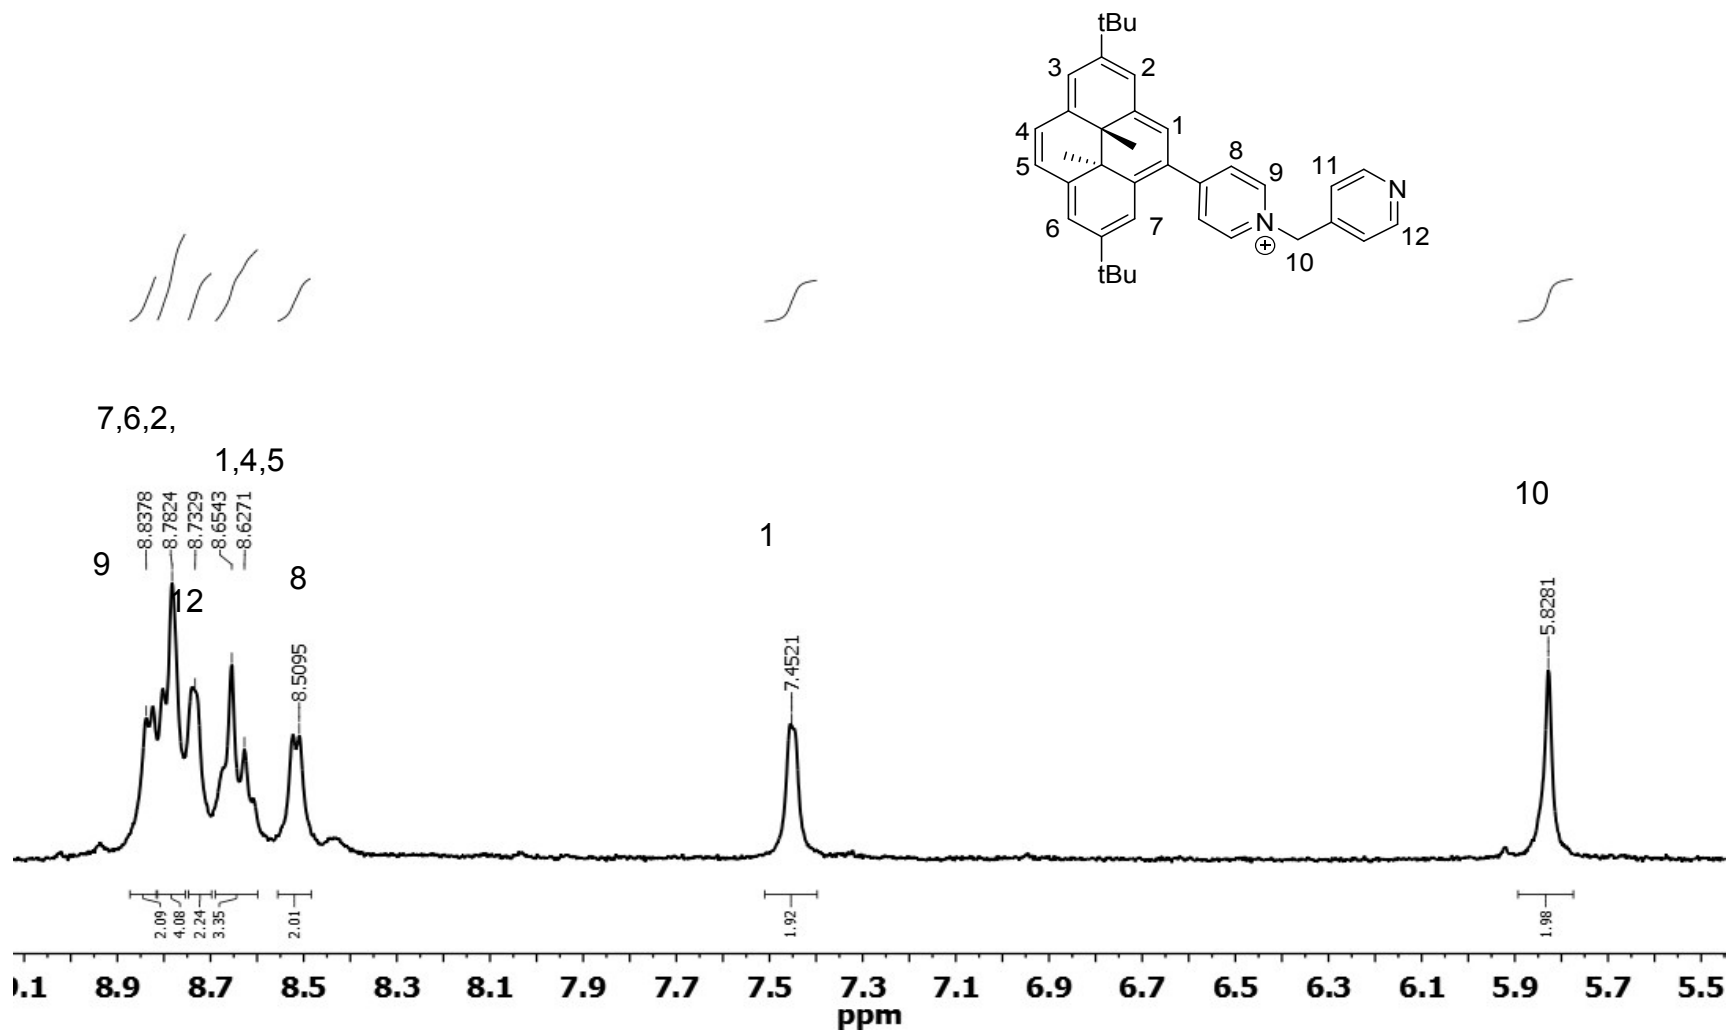

**Figure ESI 3** :  $^1\text{H}$  NMR spectrum of the titration (TPP)Zn with  $1_c$  (0-4 eq, in red the (TPP)Zn spectrum )

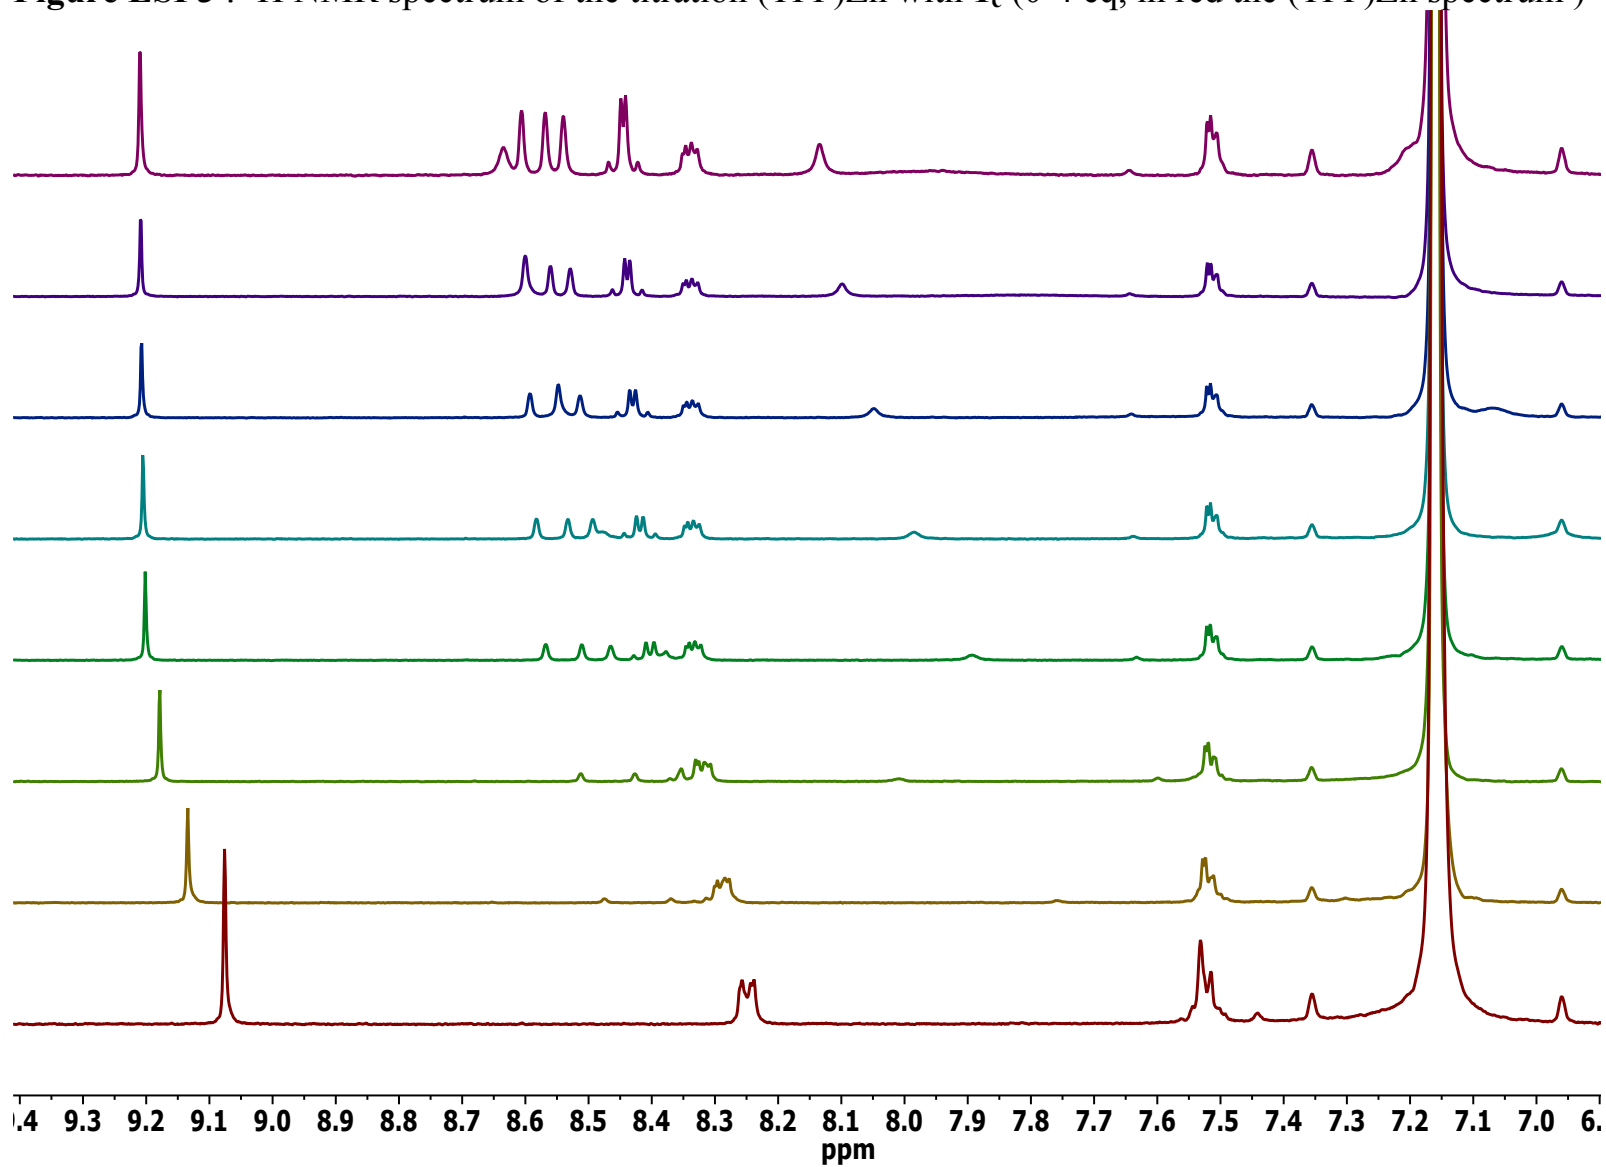

**Figure ESI 4 :**  $^1\text{H}$  NMR spectrum of the titration (TPP)Zn with  $2_c$  (0-4 eq, in red the (TPP)Zn spectrum)

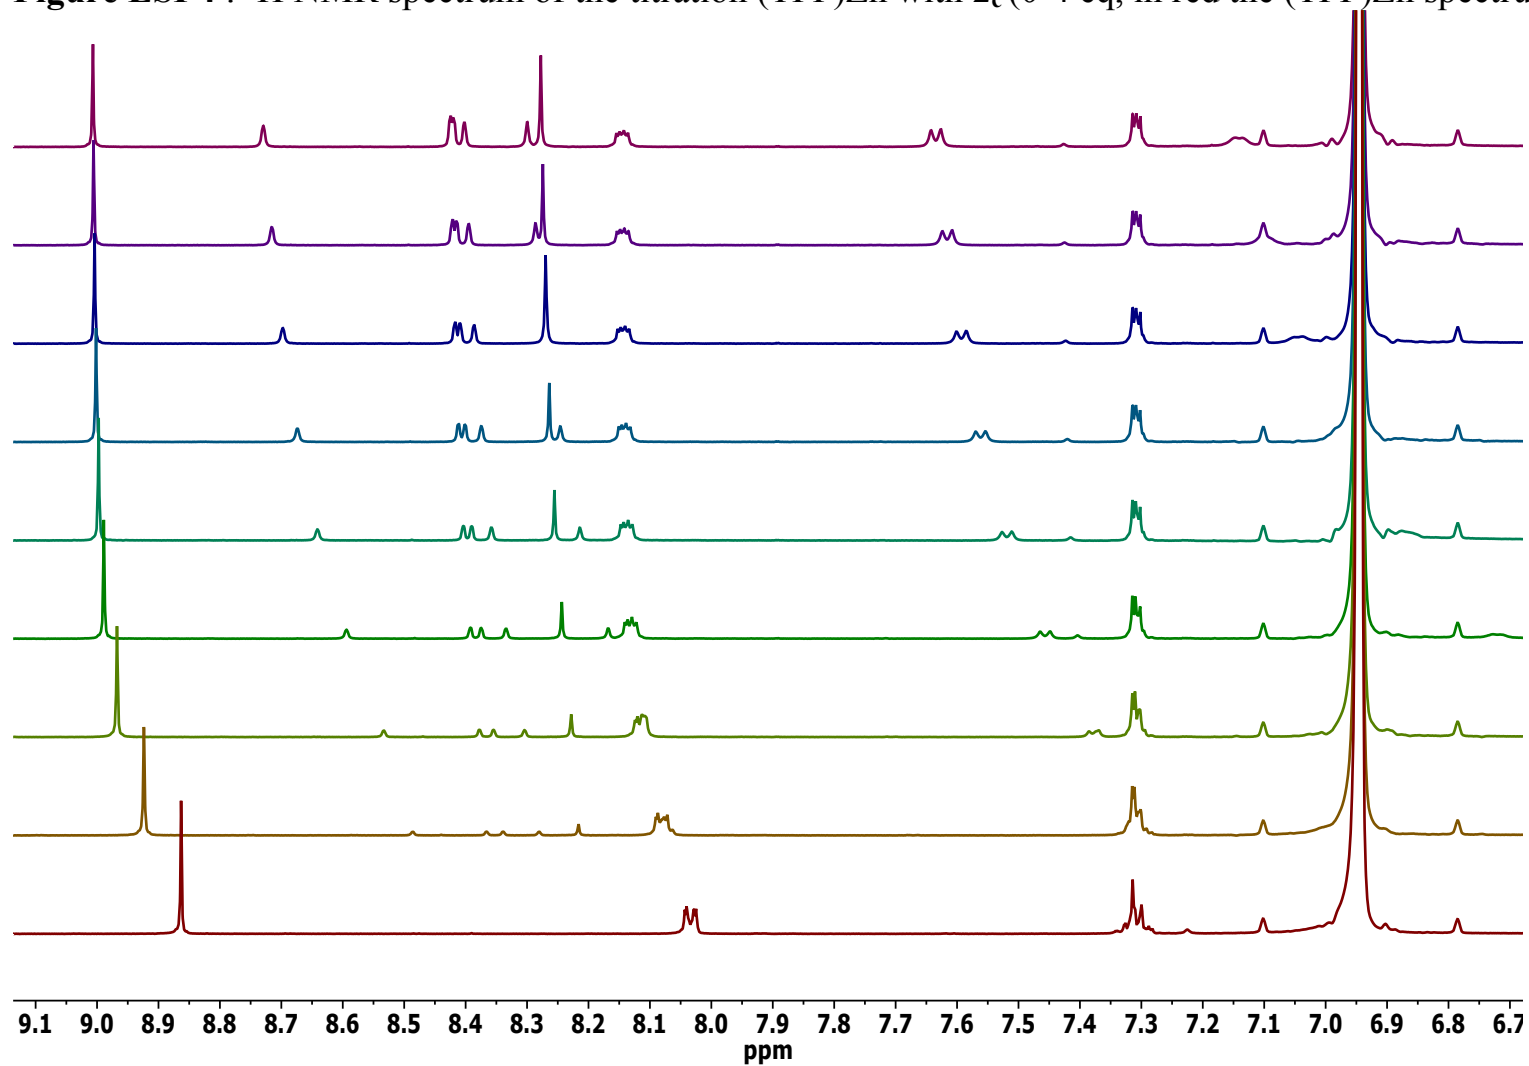

**Figure ESI 5 :**  $^1\text{H}$  NMR spectrum of the titration (TPP)Zn with  $3_c^+$  (0-4 eq, in red the (TPP)Zn spectrum)

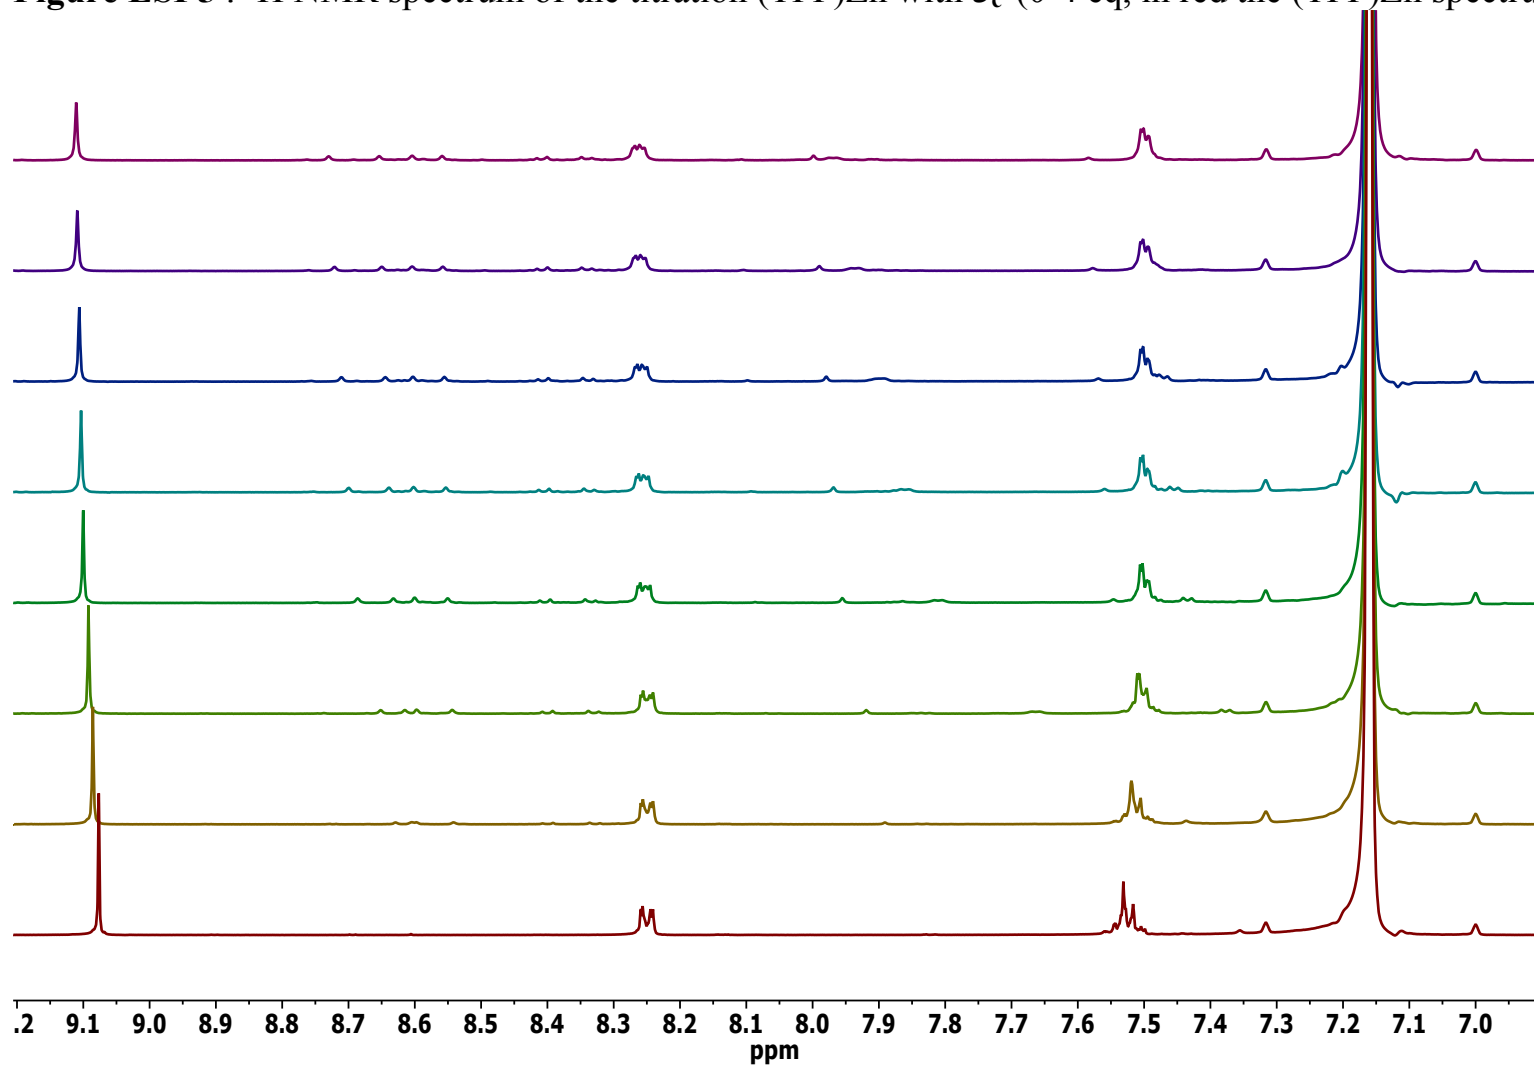

## 2. Binding constants

The binding constants of the complexations were determined by fitting of data obtained from  $^1\text{H}$  NMR titrations with equation S0 in OriginPro 8.6.0 (OriginLab Corporation)

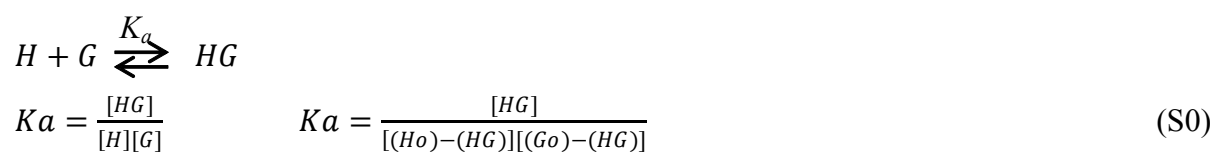

$$\Delta A = \frac{l(\Delta\varepsilon)}{2} \left( [H_0] + [G_0] + \frac{1}{K_a} \right) - \frac{1}{2} \sqrt{\left( [H_0] + [G_0] + \frac{1}{K_a} \right)^2 - 4[H_0][G_0]}$$

### 3. Crystal data

**Table S1.** Crystal Data and Structure Refinement for **2<sub>c</sub>**

|                                                                       |                                   |
|-----------------------------------------------------------------------|-----------------------------------|
| Formula                                                               | C <sub>37</sub> H <sub>39</sub> N |
| Fw (g mol <sup>-1</sup> )                                             | 497.69                            |
| Crystal system                                                        | orthorhombic                      |
| Space group                                                           | Pbca                              |
| <i>a</i> (Å)                                                          | 10.102(2)                         |
| <i>b</i> (Å)                                                          | 19.058(4)                         |
| <i>c</i> (Å)                                                          | 31.626(6)                         |
| $\alpha$ (deg.)                                                       | 90.00                             |
| $\beta$ (deg.)                                                        | 90.00                             |
| $\gamma$ (deg.)                                                       | 90.00                             |
| <i>V</i> (Å <sup>3</sup> ) / <i>Z</i>                                 | 6089(2)                           |
| <i>D<sub>x</sub></i> (g cm <sup>-3</sup> )                            | 1.086                             |
| $\mu$ (cm <sup>-1</sup> )                                             | 0.062                             |
| Crystal dim. (mm)                                                     | 0.45x0.17x0.07                    |
| <i>T</i> (K)                                                          | 200.0                             |
| $\theta$ range for coll. (deg.)                                       | 2.50 -25.00                       |
| nb. of rflns. coll.                                                   | 67156                             |
| Data/restraints/parameters                                            | 5336/84/382                       |
| R ( <i>I</i> ) <sup>a</sup> all/R[ <i>I</i> >2 $\sigma$ ( <i>I</i> )] | 11.26% / 7.51%                    |
| Goodness of fit <i>S</i>                                              | 1.137                             |
| $\Delta\rho_{\min}/\Delta\rho_{\max}$ (e Å <sup>-3</sup> )            | -0.236 / 0.208                    |

$$^a R = \frac{\sum ||I_o| - |I_c||}{\sum |I_o|}$$



#### 4. TD-DFT values

**Table S2.** B3LYP/6-311G(d,p) Cartesian coordinates and energy for  $S_0$   $\mathbf{1}_{c,model}$ .

|   |             |             |             |                             |
|---|-------------|-------------|-------------|-----------------------------|
| C | 0.36359130  | 2.94151696  | 1.47429523  | B3LYP energy:               |
| C | 0.38823624  | 3.02363910  | 2.86975665  |                             |
| C | 0.27407823  | 1.88991580  | 3.68033408  | $E(S_0) = -942.815812$ a.u. |
| C | 0.05974885  | 0.62736946  | 3.13410904  |                             |
| C | 0.14894074  | 1.72827285  | 0.82467666  |                             |
| C | 0.01528821  | -0.55364984 | 3.88131802  |                             |
| C | -0.16045232 | -1.79951821 | 3.27630129  |                             |
| C | -0.13641009 | -1.96142623 | 1.88702917  | CAM-B3LYP energy:           |
| C | -0.38271034 | -3.17248230 | 1.24639826  |                             |
| C | -0.45391457 | -3.24965756 | -0.14436506 | $E(S_0) = -942.261355$ a.u. |
| C | -0.32594169 | -2.12107505 | -0.96394081 |                             |
| C | -0.04318085 | -0.86233626 | -0.44239426 |                             |
| C | 0.04309636  | 0.32812635  | -1.20252710 |                             |
| C | 0.20128353  | 1.56840981  | -0.56068266 |                             |
| C | -0.29044154 | 0.52730774  | 1.65055922  |                             |
| C | 0.30475391  | -0.76308982 | 1.04774205  |                             |
| C | -1.85895009 | 0.53246171  | 1.59163522  |                             |
| C | 1.87260357  | -0.77491399 | 1.10559564  |                             |
| H | 0.56105382  | 3.83060561  | 0.88319148  |                             |
| H | 0.40150678  | 1.98654331  | 4.75430229  |                             |
| H | -0.58189697 | -4.05700559 | 1.84382331  |                             |
| H | -0.50291999 | -2.23129183 | -2.02665317 |                             |
| H | 0.56700781  | 3.98641614  | 3.33578277  |                             |
| H | -0.68280399 | -4.20344134 | -0.60701987 |                             |
| H | 0.08938295  | -0.49028030 | 4.96271786  |                             |
| H | -0.30091967 | -2.67888156 | 3.89758973  |                             |
| H | 0.37416953  | 2.44813490  | -1.17293997 |                             |
| H | -2.27643339 | -0.29506150 | 2.16637058  |                             |
| H | -2.21203878 | 0.46103407  | 0.56187326  |                             |
| H | 2.22771404  | -0.70628950 | 2.13460337  |                             |
| H | 2.29418124  | 0.05038966  | 0.53038785  |                             |
| H | -2.22504920 | 1.46798685  | 2.01776268  |                             |
| H | 2.23346624  | -1.71284318 | 0.67968451  |                             |
| C | 0.00833242  | 0.31870008  | -2.68976018 |                             |
| C | 0.86728494  | -0.47985825 | -3.45622558 |                             |
| C | -0.86272649 | 1.15804858  | -3.39571158 |                             |
| C | 0.81176753  | -0.40647968 | -4.84455876 |                             |
| H | 1.58448950  | -1.13464269 | -2.97631755 |                             |
| C | -0.84162779 | 1.15373766  | -4.78732991 |                             |
| H | -1.55964124 | 1.79646539  | -2.86524812 |                             |
| N | -0.02463544 | 0.38971088  | -5.51837651 |                             |
| H | 1.47945036  | -1.01612138 | -5.44772690 |                             |
| H | -1.51924726 | 1.79625577  | -5.34348676 |                             |

**Table S2 (continued).** B3LYP/6-311G(d,p) Cartesian coordinates and energy for  $S_0$   $\mathbf{1}_{o,model}$ .

|   |                 |                 |                 |
|---|-----------------|-----------------|-----------------|
| C | -0.651162807228 | 2.781060847659  | 1.401160275209  |
| C | -0.305597831276 | 2.998551420332  | 2.731243091924  |
| C | -0.111190730632 | 1.896644989878  | 3.560009482994  |
| C | -0.441685550084 | 0.605024839297  | 3.121565125818  |
| C | -0.983192195503 | 1.494719532877  | 0.941965535869  |
| C | 0.195319217845  | -0.550204207823 | 3.808905966332  |
| C | 0.911692523473  | -1.518807399555 | 3.195238735139  |
| C | 0.932197562256  | -1.779048730736 | 1.727746264568  |
| C | 0.548915823333  | -3.054162848157 | 1.290907393968  |
| C | 0.159765159320  | -3.270658397960 | -0.028473736374 |
| C | -0.013702643517 | -2.172607842523 | -0.863653905317 |
| C | 0.379566383763  | -0.888772244872 | -0.450558951799 |
| C | -0.201462918541 | 0.296300754711  | -1.169993639799 |
| C | -0.906827845551 | 1.265781599102  | -0.521644980409 |
| C | -1.114610441345 | 0.452085655650  | 1.888289346898  |
| C | 1.065976092439  | -0.742041951109 | 0.773473680763  |
| C | -1.978898477536 | -0.752571278829 | 1.619245768384  |
| C | 1.931269608157  | 0.465089822688  | 1.041139803573  |
| H | -0.615329788620 | 3.600846836399  | 0.691124195623  |
| H | 0.348999847674  | 2.022625210239  | 4.534685854934  |
| H | 0.504144210130  | -3.866404710407 | 2.009337267403  |
| H | -0.492502727046 | -2.295669263286 | -1.828479409064 |
| H | -0.086491381937 | 3.999156472162  | 3.085166025650  |
| H | -0.105941607042 | -4.265391213382 | -0.366960941099 |
| H | 0.218895424124  | -0.525545893408 | 4.895856868997  |
| H | 1.389535828549  | -2.260920773531 | 3.830607091235  |
| H | -1.280804333333 | 2.081716152999  | -1.134855057733 |
| H | -1.926509120582 | -1.110739907510 | 0.593630444178  |
| H | -1.757923289109 | -1.575618403886 | 2.295512739759  |
| H | 1.787264361635  | 1.237412876045  | 0.287375025528  |
| H | 1.786048567853  | 0.905612274510  | 2.025157824041  |
| H | -3.017574241940 | -0.451170802766 | 1.802396048102  |
| H | 2.977299750085  | 0.142075585501  | 0.983954009135  |
| C | -0.076928123869 | 0.349406073551  | -2.648691541337 |
| C | 1.091854736719  | -0.090104046213 | -3.286198358570 |
| C | -1.092002095966 | 0.844060993036  | -3.480279007234 |
| C | 1.197951974597  | 0.010190786340  | -4.669307213748 |
| H | 1.911616540918  | -0.498826556060 | -2.707767528972 |
| C | -0.886785308694 | 0.897323670008  | -4.854744695878 |
| H | -2.042073016665 | 1.159958873382  | -3.066363971112 |
| N | 0.235063876547  | 0.494609012117  | -5.460334182908 |
| H | 2.105625245907  | -0.317673239973 | -5.169049342183 |
| H | -1.670821809307 | 1.275021923505  | -5.505860832492 |

B3LYP energy:

$E(S_0) = -942.783809$  a.u.

**Table S2 (continued).** UB3LYP/6-311G(d,p) Cartesian coordinates and energies for  $S_0$  transition state between  $\mathbf{1}_{c,model}$  and  $\mathbf{1}_{o,model}$ .

|   |                 |                 |                 |
|---|-----------------|-----------------|-----------------|
| C | -0.651162807228 | 2.781060847659  | 1.401160275209  |
| C | -0.305597831276 | 2.998551420332  | 2.731243091924  |
| C | -0.111190730632 | 1.896644989878  | 3.560009482994  |
| C | -0.441685550084 | 0.605024839297  | 3.121565125818  |
| C | -0.983192195503 | 1.494719532877  | 0.941965535869  |
| C | 0.195319217845  | -0.550204207823 | 3.808905966332  |
| C | 0.911692523473  | -1.518807399555 | 3.195238735139  |
| C | 0.932197562256  | -1.779048730736 | 1.727746264568  |
| C | 0.548915823333  | -3.054162848157 | 1.290907393968  |
| C | 0.159765159320  | -3.270658397960 | -0.028473736374 |
| C | -0.013702643517 | -2.172607842523 | -0.863653905317 |
| C | 0.379566383763  | -0.888772244872 | -0.450558951799 |
| C | -0.201462918541 | 0.296300754711  | -1.169993639799 |
| C | -0.906827845551 | 1.265781599102  | -0.521644980409 |
| C | -1.114610441345 | 0.452085655650  | 1.888289346898  |
| C | 1.065976092439  | -0.742041951109 | 0.773473680763  |
| C | -1.978898477536 | -0.752571278829 | 1.619245768384  |
| C | 1.931269608157  | 0.465089822688  | 1.041139803573  |
| H | -0.615329788620 | 3.600846836399  | 0.691124195623  |
| H | 0.348999847674  | 2.022625210239  | 4.534685854934  |
| H | 0.504144210130  | -3.866404710407 | 2.009337267403  |
| H | -0.492502727046 | -2.295669263286 | -1.828479409064 |
| H | -0.086491381937 | 3.999156472162  | 3.085166025650  |
| H | -0.105941607042 | -4.265391213382 | -0.366960941099 |
| H | 0.218895424124  | -0.525545893408 | 4.895856868997  |
| H | 1.389535828549  | -2.260920773531 | 3.830607091235  |
| H | -1.280804333333 | 2.081716152999  | -1.134855057733 |
| H | -1.926509120582 | -1.110739907510 | 0.593630444178  |
| H | -1.757923289109 | -1.575618403886 | 2.295512739759  |
| H | 1.787264361635  | 1.237412876045  | 0.287375025528  |
| H | 1.786048567853  | 0.905612274510  | 2.025157824041  |
| H | -3.017574241940 | -0.451170802766 | 1.802396048102  |
| H | 2.977299750085  | 0.142075585501  | 0.983954009135  |
| C | -0.076928123869 | 0.349406073551  | -2.648691541337 |
| C | 1.091854736719  | -0.090104046213 | -3.286198358570 |
| C | -1.092002095966 | 0.844060993036  | -3.480279007234 |
| C | 1.197951974597  | 0.010190786340  | -4.669307213748 |
| H | 1.911616540918  | -0.498826556060 | -2.707767528972 |
| C | -0.886785308694 | 0.897323670008  | -4.854744695878 |
| H | -2.042073016665 | 1.159958873382  | -3.066363971112 |
| N | 0.235063876547  | 0.494609012117  | -5.460334182908 |
| H | 2.105625245907  | -0.317673239973 | -5.169049342183 |
| H | -1.670821809307 | 1.275021923505  | -5.505860832492 |

UB3LYP energies:

$$E(S_0) = -942.745791 \text{ a.u.}$$

$$\langle S^2 \rangle = 1.020695$$

$$E(T_1) = -942.739932 \text{ a.u.}$$

$$\langle S^2 \rangle = 2.040388$$

**Table S2 (continued).** TD-CAM-B3LYP/6-311G(d,p) Cartesian coordinates and energy for  $S_1(\text{LE}) \mathbf{1}_{\text{c,model}}$ .

|   |             |             |             |                                     |
|---|-------------|-------------|-------------|-------------------------------------|
| C | 0.35255954  | 2.94377381  | 1.47287614  | TD-CAM-B3LYP energy:                |
| C | 0.39521780  | 3.02858701  | 2.86457892  |                                     |
| C | 0.28086467  | 1.89465875  | 3.66944396  |                                     |
| C | 0.05021066  | 0.63293574  | 3.11451024  | $E(S_1) = -942.183822 \text{ a.u.}$ |
| C | 0.11917812  | 1.72416763  | 0.82965573  |                                     |
| C | 0.02929682  | -0.54922935 | 3.86269496  |                                     |
| C | -0.12890090 | -1.79680620 | 3.25966077  |                                     |
| C | -0.10929432 | -1.95832892 | 1.86886518  |                                     |
| C | -0.38443537 | -3.17235858 | 1.23771931  |                                     |
| C | -0.48617754 | -3.25035856 | -0.14917941 |                                     |
| C | -0.35528155 | -2.12325160 | -0.96297174 |                                     |
| C | -0.03441611 | -0.86908431 | -0.43568576 |                                     |
| C | 0.04478325  | 0.32101850  | -1.19732627 |                                     |
| C | 0.18185233  | 1.56434761  | -0.55465386 |                                     |
| C | -0.30189487 | 0.52681677  | 1.64632030  |                                     |
| C | 0.31381670  | -0.76425207 | 1.03864148  |                                     |
| C | -1.85702696 | 0.47005937  | 1.57057264  |                                     |
| C | 1.86928333  | -0.71313857 | 1.11488823  |                                     |
| H | 0.54207275  | 3.82702072  | 0.87344960  |                                     |
| H | 0.41231439  | 1.98109214  | 4.74215826  |                                     |
| H | -0.57581115 | -4.05069708 | 1.84381932  |                                     |
| H | -0.55266779 | -2.22030524 | -2.02170906 |                                     |
| H | 0.57869920  | 3.98976199  | 3.32946881  |                                     |
| H | -0.73233473 | -4.20006945 | -0.60870040 |                                     |
| H | 0.12483924  | -0.48547775 | 4.94124975  |                                     |
| H | -0.27142051 | -2.67467478 | 3.88066177  |                                     |
| H | 0.37099682  | 2.44082286  | -1.16490818 |                                     |
| H | -2.23771865 | -0.37977132 | 2.13706158  |                                     |
| H | -2.18615086 | 0.37854042  | 0.53517054  |                                     |
| H | 2.19939871  | -0.62358281 | 2.14975230  |                                     |
| H | 2.25439442  | 0.13452039  | 0.54809786  |                                     |
| H | -2.27479057 | 1.38558343  | 1.99029379  |                                     |
| H | 2.28307760  | -1.63111567 | 0.69601715  |                                     |
| C | 0.00940452  | 0.31372091  | -2.67666091 |                                     |
| C | 0.82016315  | -0.52811356 | -3.43940203 |                                     |
| C | -0.80705142 | 1.19949791  | -3.37978279 |                                     |
| C | 0.77348949  | -0.44850999 | -4.82142112 |                                     |
| H | 1.49709362  | -1.22318640 | -2.95961392 |                                     |
| C | -0.78330938 | 1.19618556  | -4.76552921 |                                     |
| H | -1.46804465 | 1.87452264  | -2.85041771 |                                     |
| N | -0.01204365 | 0.39178670  | -5.49116875 |                                     |
| H | 1.40709702  | -1.09249776 | -5.42408331 |                                     |
| H | -1.42184676 | 1.87609174  | -5.32183865 |                                     |

**Table S2 (continued).** TD-CAM-B3LYP/6-311G(d,p) Cartesian coordinates and energy for  $S_2(Z)$   $\mathbf{1}_{c,model}$  (CPD\*).

|   |           |           |           |
|---|-----------|-----------|-----------|
| C | 0.349769  | 2.926431  | 1.480958  |
| C | 0.448252  | 3.013753  | 2.869680  |
| C | 0.353762  | 1.864519  | 3.661080  |
| C | 0.058639  | 0.634673  | 3.108753  |
| C | 0.061131  | 1.727505  | 0.846669  |
| C | 0.058381  | -0.578374 | 3.862742  |
| C | -0.045982 | -1.805120 | 3.269909  |
| C | -0.086920 | -1.956264 | 1.848416  |
| C | -0.434536 | -3.142175 | 1.229106  |
| C | -0.592505 | -3.220326 | -0.155775 |
| C | -0.463938 | -2.081078 | -0.954361 |
| C | -0.071392 | -0.864108 | -0.428297 |
| C | -0.003258 | 0.358792  | -1.199198 |
| C | 0.076727  | 1.579537  | -0.567602 |
| C | -0.335232 | 0.537850  | 1.664006  |
| C | 0.319729  | -0.771920 | 1.019855  |
| C | -1.883289 | 0.393781  | 1.585946  |
| C | 1.868901  | -0.634741 | 1.103382  |
| H | 0.530198  | 3.808864  | 0.875977  |
| H | 0.549544  | 1.930205  | 4.726276  |
| H | -0.628573 | -4.017396 | 1.840391  |
| H | -0.710139 | -2.150797 | -2.006074 |
| H | 0.666230  | 3.968486  | 3.331758  |
| H | -0.880766 | -4.160391 | -0.609506 |
| H | 0.147690  | -0.507904 | 4.941895  |
| H | -0.118762 | -2.697658 | 3.881549  |
| H | 0.220284  | 2.471410  | -1.167503 |
| H | -2.214284 | -0.474836 | 2.154870  |
| H | -2.200653 | 0.278056  | 0.549190  |
| H | 2.186460  | -0.518170 | 2.139508  |
| H | 2.205369  | 0.230732  | 0.533014  |
| H | -2.352101 | 1.286329  | 2.002094  |
| H | 2.334664  | -1.530689 | 0.690806  |
| C | 0.010957  | 0.330588  | -2.678692 |
| C | 0.848242  | -0.525792 | -3.395624 |
| C | -0.785406 | 1.198623  | -3.424990 |
| C | 0.852453  | -0.469014 | -4.779725 |
| H | 1.504944  | -1.213647 | -2.879058 |
| C | -0.710639 | 1.171492  | -4.808702 |
| H | -1.470831 | 1.875690  | -2.930921 |
| N | 0.089886  | 0.357888  | -5.491340 |
| H | 1.508019  | -1.122166 | -5.347972 |
| H | -1.331542 | 1.838067  | -5.399918 |

TD-CAM-B3LYP energy:

$E(S_2) = -942.176817$  a.u.

**Table S2 (continued).** B3LYP/6-311G(d,p) Cartesian coordinates and energy for  $S_0$   
 $Z_{c,model}$

|   |                 |                 |                 |
|---|-----------------|-----------------|-----------------|
| C | -0.183430468160 | 1.026278419886  | 0.030090620899  |
| C | 0.663012407019  | 3.126908805625  | 0.915752441385  |
| H | 1.319414295860  | 3.645828575950  | 1.605050389692  |
| C | -0.258424804938 | -0.460137051796 | 0.049839667098  |
| C | 0.897631182247  | -1.272335897673 | -0.039040062262 |
| C | 2.179051595867  | -0.802927786140 | -0.310757834289 |
| H | 2.334219435080  | 0.255845159601  | -0.477674361556 |
| C | -0.099999179585 | 5.346983884682  | 0.022270137840  |
| C | -0.953352291816 | 3.155950752626  | -0.859108318189 |
| H | -1.594227469119 | 3.697493248525  | -1.545579136334 |
| C | -1.525393862395 | -1.051643600811 | 0.194556068422  |
| H | -2.378969506405 | -0.404424720394 | 0.371521173319  |
| C | -0.129536729695 | 3.865204137767  | 0.025465846687  |
| C | -0.983553461904 | 1.766812383370  | -0.851965479929 |
| H | -1.630942855915 | 1.243063738887  | -1.546308428794 |
| N | -0.044444707422 | 8.176285106082  | 0.015466048210  |
| C | 3.272822653579  | -1.668465712850 | -0.440512309210 |
| C | 1.896899685328  | -3.645791717528 | -0.149339941951 |
| C | 0.731490912155  | -2.835568556685 | 1.860807776263  |
| H | 1.684480010608  | -2.453811566338 | 2.231606701652  |
| H | 0.616863089378  | -3.864364832672 | 2.204541459245  |
| H | -0.071256059286 | -2.229931119639 | 2.283410501489  |
| C | -1.745317610024 | -2.428086433065 | 0.123562468007  |
| C | 0.639459665382  | 1.737914902812  | 0.915556074766  |
| H | 1.257032694853  | 1.193987911176  | 1.620541792021  |
| C | -0.569437922548 | -3.225734053149 | -1.884197756147 |
| H | -1.519865517279 | -3.607513580312 | -2.260707687013 |
| H | 0.235643565359  | -3.831329918823 | -2.301951297976 |
| H | -0.451134320823 | -2.196385193190 | -2.225689980482 |
| C | 3.135758848699  | -3.055212126246 | -0.382658824071 |
| H | 3.994982206417  | -3.688279946935 | -0.582878564344 |
| C | -2.987074309893 | -3.026813776098 | 0.322681695776  |
| H | -3.851124547267 | -2.399856140286 | 0.520898067118  |
| C | -3.129614498970 | -4.417722601746 | 0.331501738989  |
| C | 1.675493361235  | -5.026335125214 | -0.188781713863 |
| H | 2.528112346719  | -5.683614259211 | -0.330777080485 |
| C | 0.403437409668  | -5.579135221148 | -0.027248750624 |
| H | 0.293346095345  | -6.657568359146 | 0.034977014702  |
| C | -2.031461911110 | -5.275644093988 | 0.216386202809  |
| H | -2.175651970922 | -6.345751550131 | 0.330997661428  |
| C | -0.185704979400 | 6.082848077473  | -1.166754285566 |
| H | -0.251254342884 | 5.580880913272  | -2.124771462133 |
| C | 0.037340221450  | 7.474220006884  | 1.149888293752  |
| H | 0.119365090537  | 8.054526622800  | 2.065112824736  |
| C | 0.732624592235  | -2.760284189019 | 0.293821000959  |
| C | 0.014687685996  | 6.084581200798  | 1.207765124271  |
| H | 0.060488313909  | 5.585211836676  | 2.168273909518  |
| C | -0.744673789194 | -4.782414878709 | 0.017301473052  |
| C | -0.578133953284 | -3.300811533575 | -0.316262272577 |
| C | -0.153864080756 | 7.472569009298  | -1.115591566110 |
| H | -0.213231096672 | 8.051261087014  | -2.033577859152 |
| H | 4.246644326779  | -1.244963059856 | -0.660848912605 |
| H | -4.113055504039 | -4.843445308829 | 0.498242821557  |

B3LYP energy:

$E(S_0) = -1173.925574$  a.u.

CAM-B3LYP energy:

$E(S_0) = -1173.236255$  a.u.

**Table S2 (continued).** B3LYP/6-311G(d,p) Cartesian coordinates and energy for  $S_0$   
 $Z_{o,model}$

|   |                 |                 |                 |
|---|-----------------|-----------------|-----------------|
| C | -1.030621375378 | 2.696397666717  | 2.945165551317  |
| C | -0.678332802410 | 3.037263684590  | 4.247219381467  |
| C | -0.301006211432 | 2.023890347593  | 5.124604511612  |
| C | -0.456319550322 | 0.675645798364  | 4.767448259371  |
| C | -1.188251271986 | 1.351712783155  | 2.566516785391  |
| C | 0.363317735581  | -0.335549235405 | 5.487411505987  |
| C | 1.191408801698  | -1.226180193534 | 4.896531569392  |
| C | 1.200634078024  | -1.565489462308 | 3.445137968645  |
| C | 0.991236026212  | -2.905414612313 | 3.092447722653  |
| C | 0.594480035263  | -3.251169412789 | 1.803243860111  |
| C | 0.237614040812  | -2.239230564602 | 0.918966306424  |
| C | 0.453906424628  | -0.890366238992 | 1.247083679948  |
| C | -0.314866044468 | 0.155462622122  | 0.487602373194  |
| C | -1.128777295402 | 1.051996013190  | 1.114720648700  |
| C | -1.139367078778 | 0.358058735901  | 3.571441061590  |
| C | 1.151771444813  | -0.577094427755 | 2.432783541065  |
| C | -1.829319942298 | -0.970967544789 | 3.401672883432  |
| C | 1.842544438858  | 0.754126013193  | 2.601026719237  |
| H | -1.135813819820 | 3.470762127333  | 2.192248486590  |
| H | 0.167729140027  | 2.269704864304  | 6.071985623897  |
| H | 1.087531118475  | -3.672512154985 | 3.854165838281  |
| H | -0.248932305418 | -2.484132893895 | -0.018302495830 |
| H | -0.594571637681 | 4.077663055956  | 4.539057359228  |
| H | 0.464148482246  | -4.291593408892 | 1.528778749493  |
| H | 0.419443776714  | -0.244899847948 | 6.569712718790  |
| H | 1.792180815713  | -1.854720797551 | 5.549862344681  |
| H | -1.634325460866 | 1.772258340237  | 0.476596726908  |
| H | -1.757356679036 | -1.378472302982 | 2.395927637808  |
| H | -1.471526943125 | -1.712656819395 | 4.112734593835  |
| H | 1.564397821768  | 1.452513367269  | 1.813483757871  |
| H | 1.666679674853  | 1.226365005724  | 3.565123960099  |
| H | -2.894495673400 | -0.809832690510 | 3.608521706457  |
| H | 2.921917699995  | 0.580065175206  | 2.519759571910  |
| C | -0.252338684529 | 0.130112631483  | -0.995861942709 |
| C | 0.955353163050  | -0.165688587946 | -1.648250356089 |
| C | -1.369780941642 | 0.410086310246  | -1.798477303929 |
| C | 1.050276597704  | -0.146183500047 | -3.032959536371 |
| H | 1.829774757121  | -0.411692359052 | -1.057196414210 |
| C | -1.277277351524 | 0.420031666827  | -3.183793512636 |
| H | -2.327817058737 | 0.604535989406  | -1.330683394160 |
| H | 1.996552128434  | -0.389471040570 | -3.502532395551 |
| H | -2.157382950743 | 0.655219883329  | -3.771431032881 |
| C | -0.063956793989 | 0.148404503351  | -3.831795502541 |
| C | 0.035067030207  | 0.160445183673  | -5.309875358734 |
| C | 1.176172608568  | 0.639005459969  | -5.967127071770 |
| C | -1.006383202508 | -0.304366524904 | -6.123773980841 |
| C | 1.219961606291  | 0.630400883609  | -7.357350522846 |
| H | 2.012216330696  | 1.037810274029  | -5.405006081285 |
| C | -0.862453178025 | -0.269400150589 | -7.506826507943 |
| H | -1.910000082552 | -0.713134708304 | -5.687452887693 |
| N | 0.226217239757  | 0.187180514779  | -8.133652509257 |
| H | 2.098706506352  | 1.005617082974  | -7.875178675352 |
| H | -1.662846287793 | -0.633820194472 | -8.145351022757 |

B3LYP energy:

$$E(S_0) = -1173.893604 \text{ a.u.}$$

**Table S2 (continued).** UB3LYP/6-311G(d,p) Cartesian coordinates and energies for  $S_0$  transition state between  $\mathbf{Z}_{c,model}$  and  $\mathbf{Z}_{o,model}$ .

|   |                 |                 |                 |
|---|-----------------|-----------------|-----------------|
| C | 0.446665567088  | 1.980811733462  | 5.230429634508  |
| C | -0.007072840765 | 0.752741947789  | 4.772176825890  |
| C | -0.580174883661 | 0.660361601735  | 3.429441333881  |
| C | -0.277062363162 | 1.753647139421  | 2.509804194496  |
| C | 0.178453527302  | 2.965055825254  | 3.028892568395  |
| C | 0.472349833577  | 3.107114282623  | 4.389399180016  |
| C | -0.297965316414 | 1.522233701361  | 1.079499769868  |
| C | -0.139328397708 | 0.303028297754  | 0.465913881354  |
| C | -0.010695612692 | -0.937969703132 | 1.265538791780  |
| C | -0.584042791715 | -2.132909542087 | 0.847035104412  |
| C | -0.658245244930 | -3.247697994887 | 1.695821411144  |
| C | -0.290837388710 | -3.122325324717 | 3.042052661525  |
| C | 0.256953814079  | -1.942793282200 | 3.528740412121  |
| C | 0.571754739641  | -0.859440129540 | 2.600317971184  |
| H | 0.827996249982  | 2.059761811321  | 6.244068510487  |
| C | 0.203296958699  | -0.473170066669 | 5.535542351968  |
| H | 0.350052157142  | 3.796795327020  | 2.352235779388  |
| H | 0.808420299867  | 4.062340290459  | 4.774589802219  |
| H | -0.306124359588 | 2.406913056368  | 0.449832801311  |
| H | -1.007346161127 | -2.196618341321 | -0.148913441310 |
| H | -1.079700074423 | -4.176839436032 | 1.331399007823  |
| H | -0.483857388883 | -3.939073351790 | 3.731175138445  |
| C | 0.358108553220  | -1.698763627977 | 4.966365709431  |
| C | -1.981368042386 | 0.065032919015  | 3.330682458555  |
| C | 1.971519403839  | -0.259226288311 | 2.706115510431  |
| H | 0.488016766340  | -2.561892384301 | 5.613068040693  |
| H | 0.307818113033  | -0.380537874313 | 6.612809885268  |
| H | -2.691573421980 | 0.793585972989  | 3.736560463008  |
| H | -2.076350102894 | -0.852975931523 | 3.909493161704  |
| H | -2.263964458560 | -0.137564951554 | 2.297962468167  |
| H | 2.068920471010  | 0.651773718609  | 2.116916177593  |
| H | 2.687788433437  | -0.990317511457 | 2.315861852714  |
| H | 2.245801772129  | -0.041935500497 | 3.737544748019  |
| C | -0.116301218255 | 0.231017903197  | -1.012380210952 |
| C | 0.775840457735  | -0.621544621880 | -1.685151062422 |
| C | -0.960118315886 | 1.033358037308  | -1.798879685364 |
| C | 0.836807585484  | -0.651648443837 | -3.071202863338 |
| H | 1.434447344581  | -1.260756913111 | -1.109431870782 |
| C | -0.905097857917 | 0.995990049205  | -3.185436730793 |
| H | -1.679944644803 | 1.681927965653  | -1.313253821464 |
| H | 1.531005695312  | -1.328856137177 | -3.555621418600 |
| H | -1.561976855994 | 1.640033355288  | -3.758963304391 |
| C | -0.002578995003 | 0.155799187653  | -3.853075163055 |
| C | 0.057942400327  | 0.117167799208  | -5.332459278626 |
| C | 1.270663965883  | -0.041207794301 | -6.016430286990 |
| C | -1.093379454726 | 0.237988720731  | -6.122008954296 |
| C | 1.274178778295  | -0.070094543615 | -7.406998594715 |
| H | 2.206081976924  | -0.115673260324 | -5.474758155214 |
| C | -0.981201989226 | 0.196551678551  | -7.507766563214 |
| H | -2.070550690051 | 0.337566600960  | -5.664633442207 |
| N | 0.175747585519  | 0.045410575501  | -8.159901746355 |
| H | 2.211226408808  | -0.186159190586 | -7.945153718348 |
| H | -1.870028777794 | 0.283208178703  | -8.127153135359 |

UB3LYP energies:

$$E(S_0) = -1173.855626 \text{ a.u.}$$

$$\langle S^2 \rangle = 1.021174$$

$$E(T_1) = -1173.849743 \text{ a.u.}$$

$$\langle S^2 \rangle = 2.040356$$



**Table S2 (continued).** TD-CAM-B3LYP/6-311G(d,p) Cartesian coordinates and energy for  $S_1(\text{LE}) \mathbf{2}_{\text{c,model}}$ .

|   |                 |                 |                 |                              |
|---|-----------------|-----------------|-----------------|------------------------------|
| C | -0.177087051600 | 1.020091749140  | 0.023899700330  | TD-CAM-B3LYP energy:         |
| C | 0.706453480836  | 3.110060526671  | 0.869220130354  |                              |
| H | 1.393053595953  | 3.629615516436  | 1.526921446844  |                              |
| C | -0.250874672178 | -0.458349558180 | 0.047215209186  | $E(S_1) = -1173.159098$ a.u. |
| C | 0.904631392947  | -1.272042587633 | -0.029057771470 |                              |
| C | 2.183332262427  | -0.797071082280 | -0.336099583197 |                              |
| H | 2.326049297191  | 0.257948903459  | -0.525701917326 |                              |
| C | -0.100402349829 | 5.324179286606  | 0.025365697744  |                              |
| C | -0.990536102709 | 3.142129147843  | -0.815403214190 |                              |
| H | -1.663101691758 | 3.686302213796  | -1.467649462557 |                              |
| C | -1.521966377019 | -1.049211800267 | 0.167349980588  |                              |
| H | -2.372683559633 | -0.403686738086 | 0.357070209402  |                              |
| C | -0.127752706545 | 3.843986444922  | 0.025303265794  |                              |
| C | -1.018908310190 | 1.758251221811  | -0.810949891434 |                              |
| H | -1.698125754314 | 1.235116709801  | -1.473506169805 |                              |
| N | -0.049535499793 | 8.136387634563  | 0.025081616232  |                              |
| C | 3.275436387556  | -1.657249018157 | -0.463343788443 |                              |
| C | 1.894271844601  | -3.621089004246 | -0.114222750146 |                              |
| C | 0.662804058181  | -2.832145844921 | 1.859202540071  |                              |
| H | 1.594541191087  | -2.458683082000 | 2.285656721547  |                              |
| H | 0.523745577742  | -3.865009791474 | 2.178487606576  |                              |
| H | -0.162394444815 | -2.231427567893 | 2.241578502314  |                              |
| C | -1.741586356338 | -2.424440746866 | 0.087700351433  |                              |
| C | 0.685709569066  | 1.726790771616  | 0.865720464153  |                              |
| H | 1.337529133478  | 1.181023772949  | 1.536520710300  |                              |
| C | -0.500311221637 | -3.201988111952 | -1.882681107577 |                              |
| H | -1.429570271604 | -3.575994262877 | -2.313431461786 |                              |
| H | 0.326862603616  | -3.803003847271 | -2.260306017054 |                              |
| H | -0.358423318168 | -2.168748610962 | -2.200660981538 |                              |
| C | 3.136807980945  | -3.040619128266 | -0.372622663314 |                              |
| H | 3.990062683160  | -3.682636873345 | -0.560608144778 |                              |
| C | -2.990325388238 | -3.016629338797 | 0.301875335862  |                              |
| H | -3.848851859486 | -2.381063097600 | 0.487426795729  |                              |
| C | -3.136120853420 | -4.403746017327 | 0.330883579852  |                              |
| C | 1.672858960032  | -5.003513417996 | -0.147516532450 |                              |
| H | 2.524288510504  | -5.660987181616 | -0.286924175607 |                              |
| C | 0.398570191093  | -5.552737126050 | -0.007222797456 |                              |
| H | 0.286987757624  | -6.628331012006 | 0.078026335887  |                              |
| C | -2.037158236751 | -5.256167801492 | 0.221316634546  |                              |
| H | -2.171177420650 | -6.325179665609 | 0.342893269446  |                              |
| C | -0.224443850002 | 6.057049937877  | -1.153427620359 |                              |
| H | -0.321326430338 | 5.556678622405  | -2.108717323242 |                              |
| C | 0.068688955060  | 7.436725194401  | 1.150135793809  |                              |
| H | 0.179033020616  | 8.014698844034  | 2.062843459727  |                              |
| C | 0.732996147682  | -2.743405857539 | 0.305311315621  |                              |
| C | 0.050141791964  | 6.052307313767  | 1.204034472214  |                              |
| H | 0.128792575024  | 5.549103926616  | 2.159500129911  |                              |
| C | -0.750345845483 | -4.754341791981 | 0.008332999911  |                              |
| C | -0.576666075294 | -3.289058647876 | -0.329137235705 |                              |
| C | -0.193008275322 | 7.441271858227  | -1.099822717769 |                              |
| H | -0.282469319417 | 8.022681268447  | -2.012636197837 |                              |
| H | 4.246284237253  | -1.237661270011 | -0.698325479440 |                              |
| H | -4.118610023110 | -4.827829112811 | 0.500003839097  |                              |

**Table S2 (continued).** TD-CAM-B3LYP/6-311G(d,p) Cartesian coordinates and energy for  $S_2(Z)$   $Z_{c,model}$  (CPD\*).

|   |           |           |           |
|---|-----------|-----------|-----------|
| C | -0.215957 | 1.023236  | -0.054135 |
| C | 0.718385  | 3.079409  | 0.822757  |
| H | 1.431702  | 3.571467  | 1.473152  |
| C | -0.304525 | -0.450764 | -0.064647 |
| C | 0.893600  | -1.279260 | -0.101850 |
| C | 2.124256  | -0.818681 | -0.505340 |
| H | 2.236249  | 0.223716  | -0.776254 |
| C | -0.089341 | 5.326540  | 0.070989  |
| C | -1.025924 | 3.179403  | -0.809344 |
| H | -1.708560 | 3.749087  | -1.428538 |
| C | -1.543176 | -1.045976 | -0.023857 |
| H | -2.418532 | -0.414264 | 0.084855  |
| C | -0.133483 | 3.847939  | 0.027792  |
| C | -1.067960 | 1.796806  | -0.847586 |
| H | -1.763584 | 1.302168  | -1.514642 |
| N | -0.007346 | 8.137530  | 0.154302  |
| C | 3.241544  | -1.666213 | -0.609013 |
| C | 1.898112  | -3.589889 | -0.034151 |
| C | 0.541544  | -2.756344 | 1.865526  |
| H | 1.419070  | -2.331369 | 2.354578  |
| H | 0.415976  | -3.784019 | 2.204817  |
| H | -0.338148 | -2.180161 | 2.153263  |
| C | -1.746558 | -2.451538 | -0.026264 |
| C | 0.683753  | 1.697934  | 0.777805  |
| H | 1.353829  | 1.127116  | 1.408530  |
| C | -0.378958 | -3.284425 | -1.909149 |
| H | -1.255690 | -3.709070 | -2.399587 |
| H | 0.500704  | -3.863675 | -2.191339 |
| H | -0.248933 | -2.257020 | -2.249278 |
| C | 3.110924  | -3.032382 | -0.405691 |
| H | 3.958556  | -3.687495 | -0.578348 |
| C | -2.979409 | -3.028300 | 0.264895  |
| H | -3.836443 | -2.380874 | 0.417950  |
| C | -3.120516 | -4.399828 | 0.397775  |
| C | 1.690363  | -5.003994 | 0.031625  |
| H | 2.562566  | -5.648843 | 0.001027  |
| C | 0.445994  | -5.555421 | 0.099641  |
| H | 0.334342  | -6.629658 | 0.198981  |
| C | -1.993586 | -5.242145 | 0.340027  |
| H | -2.107922 | -6.298955 | 0.557951  |
| C | -0.249913 | 6.097185  | -1.079208 |
| H | -0.388050 | 5.628001  | -2.045168 |
| C | 0.145901  | 7.402165  | 1.252068  |
| H | 0.297364  | 7.950478  | 2.177121  |
| C | 0.738536  | -2.712576 | 0.322306  |
| C | 0.114043  | 6.017118  | 1.264499  |
| H | 0.223173  | 5.484324  | 2.200719  |
| C | -0.743393 | -4.751427 | 0.055980  |
| C | -0.581335 | -3.319552 | -0.367076 |
| C | -0.201246 | 7.478619  | -0.984758 |
| H | -0.318918 | 8.088605  | -1.875484 |
| H | 4.196326  | -1.252104 | -0.908296 |
| H | -4.093239 | -4.824274 | 0.612976  |

TD-CAM-B3LYP energy:

$E(S_1-Z)^* = -1173.152551$  a.u.

\* The Z state has just crossed the LE state at the CPD\* geometry.

**Table S2 (continued).** B3LYP/6-311G(d,p) Cartesian coordinates and energy for  $S_0$   $3c^+$ ,<sub>model</sub>

|   |                 |                 |                 |                              |
|---|-----------------|-----------------|-----------------|------------------------------|
| C | 0.187532128763  | 3.065171427096  | 2.630057446225  | B3LYP energy:                |
| C | 0.367455086935  | 3.476407085887  | 3.945308039581  |                              |
| C | 0.446741076798  | 2.553451989489  | 5.001080459214  |                              |
| C | 0.267263401310  | 1.194570469356  | 4.788263574092  | $E(S_0) = -1229.672840$ a.u. |
| C | 0.000165340943  | 1.713739604604  | 2.305205012393  |                              |
| C | 0.416036117988  | 0.228674594133  | 5.792434616228  |                              |
| C | 0.279773315348  | -1.130965418360 | 5.523367467270  |                              |
| C | 0.147789429006  | -1.617255901278 | 4.216618271308  | CAM-B3LYP energy:            |
| C | -0.107830075647 | -2.956990389143 | 3.928346520980  |                              |
| C | -0.380162382763 | -3.361002726355 | 2.627226685468  |                              |
| C | -0.420285748013 | -2.459215372936 | 1.549385842345  | $E(S_0) = -1228.956615$ a.u. |
| C | -0.107517539483 | -1.118052561363 | 1.699338059556  |                              |
| C | -0.172171058022 | -0.128085765842 | 0.6678437676840 |                              |
| C | -0.071922453177 | 1.248507672372  | 1.004059258153  |                              |
| C | -0.243968875610 | 0.722182238061  | 3.429805784693  |                              |
| C | 0.388628116426  | -0.643073862772 | 3.069102010352  |                              |
| C | -1.802530113518 | 0.621512734229  | 3.575072178227  |                              |
| C | 1.950616647899  | -0.554705804742 | 2.922593731330  |                              |
| H | 0.231970755672  | 3.798533350246  | 1.831022032920  |                              |
| H | 0.699318446487  | 2.905012341769  | 5.996131601953  |                              |
| H | -0.168353381445 | -3.674891005924 | 4.739198796036  |                              |
| H | -0.768826614702 | -2.835840181483 | 0.596065846612  |                              |
| H | 0.517802371390  | 4.528863294095  | 4.154702123927  |                              |
| H | -0.633013280719 | -4.398716200459 | 2.441219577887  |                              |
| H | 0.611733961193  | 0.556351730316  | 6.808196790304  |                              |
| H | 0.286514614282  | -1.841647234384 | 6.342943978127  |                              |
| H | 0.009638008302  | 1.976299852240  | 0.203618715128  |                              |
| H | -2.082056173791 | -0.058024562788 | 4.380588138361  |                              |
| H | -2.258790568639 | 0.273764863624  | 2.646502845945  |                              |
| H | 2.406251764885  | -0.204994186313 | 3.849402117054  |                              |
| H | 2.234657673847  | 0.120667975663  | 2.115272907701  |                              |
| H | -2.205377072628 | 1.608812957698  | 3.804977566911  |                              |
| H | 2.345950884749  | -1.547491120009 | 2.701680597396  |                              |
| C | -0.279502969394 | -0.464995514969 | -0.741861432450 |                              |
| C | 0.341596034151  | -1.597231019147 | -1.327482791782 |                              |
| C | -0.976452969943 | 0.377643818336  | -1.648376927819 |                              |
| C | 0.252344170355  | -1.839936437748 | -2.673714047411 |                              |
| H | 0.940240147616  | -2.266921330096 | -0.727624098971 |                              |
| C | -1.043932805284 | 0.088390136642  | -2.984787880705 |                              |
| H | -1.500951384797 | 1.251915958886  | -1.288852257283 |                              |
| N | -0.437955368625 | -1.013299217543 | -3.502898889851 |                              |
| H | 0.738003826639  | -2.686875091131 | -3.138857549290 |                              |
| H | -1.580293702643 | 0.711534599476  | -3.687079102047 |                              |
| C | -0.570741267384 | -1.324875745247 | -4.956060195652 |                              |
| H | -1.608712726437 | -1.607385364400 | -5.143136662545 |                              |
| H | 0.050361402170  | -2.201675601742 | -5.141812392879 |                              |
| C | -0.159504306823 | -0.175507997652 | -5.847625941541 |                              |
| C | -1.079537792816 | 0.423540337388  | -6.705709903620 |                              |
| C | 1.153575298520  | 0.300697933152  | -5.856032642178 |                              |
| C | -0.650605397652 | 1.468209384822  | -7.526781950426 |                              |
| H | -2.109176045202 | 0.085506213695  | -6.751231084660 |                              |
| C | 1.477587723318  | 1.350449430644  | -6.710580997325 |                              |
| H | 1.917287952638  | -0.132130887821 | -5.218896354558 |                              |
| N | 0.598813592247  | 1.931915541445  | -7.533002181514 |                              |
| H | -1.346241144059 | 1.950164653058  | -8.207048442336 |                              |
| H | 2.490577429335  | 1.740036543224  | -6.740046993672 |                              |

**Table S2 (continued).** B3LYP/6-311G(d,p) Cartesian coordinates and energy for  $S_0$   $3_0^+$ ,model.

|   |                 |                 |                 |
|---|-----------------|-----------------|-----------------|
| C | -0.328918210539 | 3.026180969714  | 2.425020953419  |
| C | 0.278855068448  | 3.536314718827  | 3.563347001010  |
| C | 0.520602766451  | 2.678041522178  | 4.635901517195  |
| C | -0.009362393758 | 1.378087618680  | 4.666694586296  |
| C | -0.835794615072 | 1.707396333256  | 2.417813639792  |
| C | 0.560687791465  | 0.398115178796  | 5.631347586615  |
| C | 1.029970823136  | -0.826166607835 | 5.305968436934  |
| C | 0.783812842143  | -1.504525259168 | 4.003109349628  |
| C | 0.145969734176  | -2.752610833945 | 4.024940574603  |
| C | -0.496989314873 | -3.245259342988 | 2.893448276180  |
| C | -0.639417133738 | -2.410591255918 | 1.789196835476  |
| C | 0.028614265360  | -1.177801188233 | 1.733203328185  |
| C | -0.431204079043 | -0.159788925287 | 0.725795871578  |
| C | -0.915884472805 | 1.076799671147  | 1.104879726068  |
| C | -0.900485255228 | 0.990483022649  | 3.644797475780  |
| C | 0.917167294296  | -0.822928948142 | 2.771725369271  |
| C | -1.957998726351 | -0.053281834616 | 3.864697032662  |
| C | 1.983321260899  | 0.228747753937  | 2.581114538894  |
| H | -0.351432723223 | 3.609729650763  | 1.510915897085  |
| H | 1.147630738788  | 3.008183269198  | 5.457232489673  |
| H | 0.103447426052  | -3.308472666531 | 4.955487633306  |
| H | -1.308598340644 | -2.696392745367 | 0.984344915739  |
| H | 0.649341020771  | 4.553659421480  | 3.580262135689  |
| H | -0.974592386758 | -4.217358265695 | 2.912848192718  |
| H | 0.741125483473  | 0.753065612979  | 6.642209862725  |
| H | 1.490060610575  | -1.414121553173 | 6.095396123454  |
| H | -1.158382580569 | 1.767314036162  | 0.300938257268  |
| H | -2.224944106504 | -0.592399813338 | 2.957400827999  |
| H | -1.701653195297 | -0.762095516122 | 4.647350077296  |
| H | 1.637054883773  | 1.128312912198  | 2.074816109698  |
| H | 2.437569597370  | 0.515644254859  | 3.527026618297  |
| H | -2.859255954833 | 0.479340000761  | 4.192712614667  |
| H | 2.777252158232  | -0.205124683296 | 1.962345484356  |
| C | -0.370118117935 | -0.492029101968 | -0.688686233103 |
| C | 0.526161465186  | -1.482677052676 | -1.160969698940 |
| C | -1.174798039257 | 0.123933955413  | -1.682999875624 |
| C | 0.617141955873  | -1.779562022324 | -2.496348178730 |
| H | 1.162595056430  | -2.013130585340 | -0.466348631517 |
| C | -1.046661188724 | -0.208669058758 | -3.004820570664 |
| H | -1.931093780975 | 0.849423007008  | -1.418487138785 |
| N | -0.156292113040 | -1.149646464688 | -3.417865662746 |
| H | 1.305415335667  | -2.522466381111 | -2.875671571811 |
| H | -1.645500258558 | 0.251683683609  | -3.778551906809 |
| C | -0.082758537032 | -1.524272904216 | -4.861860747213 |
| H | -1.004429024431 | -2.051144196258 | -5.116656763104 |
| H | 0.741586202887  | -2.231833252211 | -4.954702288593 |
| C | 0.123801476392  | -0.333855015591 | -5.769787776858 |
| C | -0.838601542739 | 0.015297420939  | -6.715167711971 |
| C | 1.290110138849  | 0.431996233519  | -5.705048189891 |
| C | -0.596584990844 | 1.110746631673  | -7.546435547192 |
| H | -1.756464020089 | -0.553034125897 | -6.820210542759 |
| C | 1.431728491260  | 1.507288521758  | -6.577448099237 |
| H | 2.080554417948  | 0.201973358113  | -4.998747734451 |
| N | 0.510465887398  | 1.850018657800  | -7.483205876653 |
| H | -1.327998918623 | 1.402233668677  | -8.294082348048 |
| H | 2.328386948184  | 2.118940354598  | -6.551982234861 |

B3LYP energy:

$E(S_0) = -1229.640038$  a.u.

**Table S2 (continued).** UB3LYP/6-311G(d,p) Cartesian coordinates and energies for  $S_0$  transition state between  $3_c^+$ ,<sub>model</sub> and  $3_o^+$ ,<sub>model</sub>.

|   |                 |                 |                 |                                  |
|---|-----------------|-----------------|-----------------|----------------------------------|
| C | 0.423925384456  | 2.661513967979  | 4.834530205084  | UB3LYP energies:                 |
| C | 0.140087947674  | 1.315106449604  | 4.724049014147  |                                  |
| C | -0.574773706902 | 0.830093065178  | 3.540861616270  | $E(S_0) = -1229.607144$ a.u.     |
| C | -0.590042864231 | 1.717696962409  | 2.375809169545  | $\langle S^2 \rangle = 0.924463$ |
| C | -0.312413736686 | 3.085606630024  | 2.561244875825  |                                  |
| C | 0.129989784041  | 3.561745059257  | 3.785016681487  |                                  |
| C | -0.712037486417 | 1.194179012325  | 1.056765003757  | $E(T_1) = -1229.603931$ a.u.     |
| C | -0.413199604027 | -0.110768496191 | 0.678016996146  | $\langle S^2 \rangle = 2.035871$ |
| C | -0.060194635467 | -1.113417950289 | 1.725431921799  |                                  |
| C | -0.575590951621 | -2.399208492110 | 1.695518458993  |                                  |
| C | -0.398408618384 | -3.288095929129 | -2.769418967949 |                                  |
| C | 0.161859415123  | -2.826351241495 | 3.964701373807  |                                  |
| C | 0.634253551311  | -1.525268582248 | 4.077452625751  |                                  |
| C | 0.670163678247  | -0.659071579056 | 2.901344812385  |                                  |
| H | 0.907347115556  | 3.032076485117  | 5.732205607302  |                                  |
| C | 0.632328204674  | 0.345863766774  | 5.702248114568  |                                  |
| H | -0.397301633875 | 3.761260083207  | 1.716516766568  |                                  |
| H | 0.333611818731  | 4.617663960116  | 3.913406488398  |                                  |
| H | -0.871883113277 | 1.928951415062  | 0.274267362980  |                                  |
| H | -1.147656453387 | -2.727462767411 | 0.834371023756  |                                  |
| H | -0.769655123374 | -4.302756171603 | 2.698462783925  |                                  |
| H | 0.178838796564  | -3.473009094384 | 4.835680450870  |                                  |
| C | 0.908780338542  | -0.945059259565 | 5.392907255685  |                                  |
| C | -1.882650603242 | 0.091004630368  | 3.813854519410  |                                  |
| C | 1.976688740638  | 0.093754094062  | 2.653440498445  |                                  |
| H | 1.265432517463  | -1.608601984467 | 6.174336340296  |                                  |
| H | 0.851158269007  | 0.708114253858  | 6.701368724678  |                                  |
| H | -2.621378210854 | 0.824042989117  | 4.152734080277  |                                  |
| H | -1.773380795699 | -0.659048569425 | 4.595427045846  |                                  |
| H | -2.273724367414 | -0.383546601232 | 2.914002958386  |                                  |
| H | 1.868560052842  | 0.863437506375  | 1.889980986319  |                                  |
| H | 2.721881239305  | -0.626287223260 | 2.301165443772  |                                  |
| H | 2.363902288076  | 0.551601372799  | 3.561839515601  |                                  |
| C | -0.406580956623 | -0.464837419381 | -0.718927417246 |                                  |
| C | 0.369490674002  | -1.546676216967 | -1.221076237238 |                                  |
| C | -1.153394743235 | 0.247273628368  | -1.702550889146 |                                  |
| C | 0.401288997342  | -1.839764686328 | -2.556956388718 |                                  |
| H | 0.972124489337  | -2.142961432057 | -0.550996431284 |                                  |
| C | -1.091813417697 | -0.088359646721 | -3.024694288059 |                                  |
| H | -1.816306961064 | 1.052583327305  | -1.419066637212 |                                  |
| N | -0.318028690946 | -1.122565166236 | -3.464761775952 |                                  |
| H | 1.001620614813  | -2.646707783080 | -2.954337452565 |                                  |
| H | -1.652580318946 | 0.440586981729  | -3.782877752611 |                                  |
| C | -0.314519975466 | -1.486840316909 | -4.907146143180 |                                  |
| H | -1.305378886087 | -1.868830321410 | -5.162620784107 |                                  |
| H | 0.394170978169  | -2.308357818335 | -5.018669668708 |                                  |
| C | 0.058960425672  | -0.331047053521 | -5.808587912966 |                                  |
| C | -0.826888464508 | 0.127062031716  | -6.781574945324 |                                  |
| C | 1.305361117465  | 0.291667825761  | -5.710876463158 |                                  |
| C | -0.432286017297 | 1.181730290416  | -7.606891855253 |                                  |
| H | -1.803764740015 | -0.326340175213 | -6.910507275229 |                                  |
| C | 1.599473383651  | 1.338035302390  | -6.580092617881 |                                  |
| H | 2.040842125095  | -0.025727858191 | -4.979602630243 |                                  |
| N | 0.752842096012  | 1.784242814723  | -7.513367749106 |                                  |
| H | -1.102785899775 | 1.555491728262  | -8.374865951042 |                                  |
| H | 2.561408422709  | 1.838968511912  | -6.528353103798 |                                  |

**Table S2 (continued).** TD-CAM-B3LYP/6-311G(d,p) Cartesian coordinates and energy for  $S_1(\text{CT-Z}) \mathbf{3}_c^+$ ,<sub>model</sub> (CPD\*).

|   |                 |                 |                 |                              |
|---|-----------------|-----------------|-----------------|------------------------------|
| C | 0.086765715523  | 3.055693671001  | 2.641776725057  | TD-CAM-B3LYP energy:         |
| C | 0.366584536399  | 3.455685521621  | 3.955871601697  |                              |
| C | 0.525774025331  | 2.539731393134  | 4.987218350075  |                              |
| C | 0.362940253532  | 1.171875020545  | 4.763851258068  | $E(S_1) = -1228.890115$ a.u. |
| C | -0.124839787313 | 1.721605099861  | 2.341214483551  |                              |
| C | 0.616186080689  | 0.193298468003  | 5.737718811417  |                              |
| C | 0.502167192527  | -1.155658431410 | 5.448414909166  |                              |
| C | 0.266035346959  | -1.625582357615 | 4.144230926961  |                              |
| C | -0.059282016241 | -2.947432757022 | 3.875183552376  |                              |
| C | -0.467359891379 | -3.328286816369 | 2.605658861134  |                              |
| C | -0.575141149993 | -2.401422146326 | 1.557237861595  |                              |
| C | -0.202303101089 | -1.083900205717 | 1.703263546689  |                              |
| C | -0.318900612650 | -0.086925721412 | 0.660446419875  |                              |
| C | -0.273445893981 | 1.259852936367  | 1.022110762266  |                              |
| C | -0.230958089459 | 0.716581351634  | 3.453202716459  |                              |
| C | 0.404546257899  | -0.633333510174 | 3.014134447282  |                              |
| C | -1.761685319893 | 0.534754452700  | 3.719471094590  |                              |
| C | 1.935445641032  | -0.465220191707 | 2.762310025012  |                              |
| H | 0.079405926006  | 3.793299655140  | 1.848135735237  |                              |
| H | 0.820758249348  | 2.883875156826  | 5.971268637050  |                              |
| H | -0.064696650357 | -3.669502689486 | 4.683483415090  |                              |
| H | -1.002340790696 | -2.738757543702 | 0.621985562417  |                              |
| H | 0.517071046688  | 4.508596191539  | 4.160898051126  |                              |
| H | -0.771345984985 | -4.352843927078 | 2.430083871827  |                              |
| H | 0.879435421850  | 0.508788656172  | 6.740302908353  |                              |
| H | 0.581457592205  | -1.881827463356 | 6.249937324071  |                              |
| H | -0.275953299611 | 2.010606074105  | 0.240100140232  |                              |
| H | -1.926404057157 | -0.197762177940 | 4.509150820370  |                              |
| H | -2.269299998811 | 0.200738860061  | 2.815013220584  |                              |
| H | 2.444882619047  | -0.150046213061 | 3.671750841793  |                              |
| H | 2.115121698622  | 0.274603261296  | 1.981312177923  |                              |
| H | -2.194023779204 | 1.485896496345  | 4.029050167449  |                              |
| H | 2.359904225037  | -1.417989328071 | 2.444689649632  |                              |
| C | -0.408176815392 | -0.423366178213 | -0.742929536072 |                              |
| C | 0.226948289747  | -1.556778512693 | -1.313619832567 |                              |
| C | -1.106768417906 | 0.404061138437  | -1.664092494926 |                              |
| C | 0.165973081850  | -1.802949377387 | -2.650218385812 |                              |
| H | 0.812317320126  | -2.226260893826 | -0.700620805697 |                              |
| C | -1.151894308294 | 0.108471251175  | -2.989029023013 |                              |
| H | -1.654600071003 | 1.269877598969  | -1.320368853175 |                              |
| N | -0.522839438990 | -0.988844175638 | -3.497539638044 |                              |
| H | 0.668257879057  | -2.646015827908 | -3.103363587699 |                              |
| H | -1.688743487855 | 0.719086312823  | -3.701496151245 |                              |
| C | -0.635312285809 | -1.296390479523 | -4.932754523489 |                              |
| H | -1.681205102846 | -1.510434870598 | -5.162112900835 |                              |
| H | -0.070716307341 | -2.212464893031 | -5.107586792101 |                              |
| C | -0.120577718178 | -0.184930797760 | -5.814852939642 |                              |
| C | -0.897498551222 | 0.313054764040  | -6.849490229749 |                              |
| C | 1.150394912790  | 0.349552281256  | -5.636039441771 |                              |
| C | -0.373338638088 | 1.315960892838  | -7.657196063473 |                              |
| H | -1.894482634817 | -0.068198913531 | -7.037249736838 |                              |
| C | 1.578213317839  | 1.349937765538  | -6.494154103638 |                              |
| H | 1.804476462625  | 0.000110128768  | -4.845696369599 |                              |
| N | 0.837052580907  | 1.831896338403  | -7.488578154387 |                              |
| H | -0.960189852891 | 1.722050309858  | -8.474713678378 |                              |
| H | 2.566021879817  | 1.784327582098  | -6.379644084271 |                              |

**Table S2 (continued).** TD-CAM-B3LYP/6-311G(d,p) Cartesian coordinates and energy for  $S_2(\text{CT-LE}) \mathbf{3c}^+$ ,<sub>model</sub>.

|   |                 |                 |                 |                              |
|---|-----------------|-----------------|-----------------|------------------------------|
| C | 0.174132433228  | 3.084548913372  | 2.638838753619  | TD-CAM-B3LYP energy:         |
| C | 0.393575311007  | 3.477615915818  | 3.926947035420  |                              |
| C | 0.498954970641  | 2.521601919666  | 4.977248602421  |                              |
| C | 0.287271845774  | 1.187135616379  | 4.754219299425  | $E(S_2) = -1228.877172$ a.u. |
| C | -0.018602534580 | 1.711828924682  | 2.302132556812  |                              |
| C | 0.458426532871  | 0.202196583655  | 5.753442914246  |                              |
| C | 0.323134553790  | -1.145800165606 | 5.477078947084  |                              |
| C | 0.167938757697  | -1.614744168437 | 4.162059115308  |                              |
| C | -0.123195031165 | -2.947520879449 | 3.871890166704  |                              |
| C | -0.418334550140 | -3.357873704960 | 2.576822873546  |                              |
| C | -0.458015844397 | -2.434387706994 | 1.525563722764  |                              |
| C | -0.106386258775 | -1.097158951977 | 1.690387500917  |                              |
| C | -0.186330783526 | -0.115844655916 | 0.666492647555  |                              |
| C | -0.086281105027 | 1.266747810375  | 1.008084672070  |                              |
| C | -0.243981426948 | 0.720135323825  | 3.414244394117  |                              |
| C | 0.417398408705  | -0.632321636494 | 3.038613956525  |                              |
| C | -1.784601283052 | 0.571823508570  | 3.568707093619  |                              |
| C | 1.961905380565  | -0.488107478618 | 2.903196432263  |                              |
| H | 0.173213667111  | 3.818929127993  | 1.840804249159  |                              |
| H | 0.785664056861  | 2.858015892696  | 5.967609650804  |                              |
| H | -0.174593262667 | -3.660980436585 | 4.686856180895  |                              |
| H | -0.831002287664 | -2.775977141353 | 0.568587875901  |                              |
| H | 0.545857812240  | 4.524926901776  | 4.153517619158  |                              |
| H | -0.691966346807 | -4.387774931850 | 2.389491034831  |                              |
| H | 0.682362125369  | 0.523373037042  | 6.764843265667  |                              |
| H | 0.341232245853  | -1.863304374639 | 6.289403318135  |                              |
| H | -0.002140966343 | 1.993597905597  | 0.208153761601  |                              |
| H | -2.035728391773 | -0.135712022250 | 4.358376833930  |                              |
| H | -2.233624107526 | 0.227433008690  | 2.636930560525  |                              |
| H | 2.412869763052  | -0.136742881443 | 3.830461143051  |                              |
| H | 2.218570354271  | 0.210716625465  | 2.107151454919  |                              |
| H | -2.219270204676 | 1.538852997447  | 3.823100592244  |                              |
| H | 2.393910691238  | -1.459820685027 | 2.661306005781  |                              |
| C | -0.303094578904 | -0.446422950414 | -0.740562217394 |                              |
| C | 0.336420311032  | -1.565996085934 | -1.325549086899 |                              |
| C | -1.031547397356 | 0.377450544611  | -1.633603251627 |                              |
| C | 0.230619266206  | -1.816121271577 | -2.661815974996 |                              |
| H | 0.959305341578  | -2.216153147506 | -0.728995458568 |                              |
| C | -1.112316077141 | 0.081929390149  | -2.959947881401 |                              |
| H | -1.567000395748 | 1.242216245504  | -1.267473463840 |                              |
| N | -0.490777951637 | -1.010268937542 | -3.481305940204 |                              |
| H | 0.724607003435  | -2.655413517274 | -3.131316180027 |                              |
| H | -1.668281659799 | 0.690590302505  | -3.659318310595 |                              |
| C | -0.633677077485 | -1.314887738827 | -4.919231710590 |                              |
| H | -1.680541361276 | -1.552984211587 | -5.116350753155 |                              |
| H | -0.050658099803 | -2.215299155667 | -5.111968609468 |                              |
| C | -0.172293563612 | -0.183908902447 | -5.804615944588 |                              |
| C | -1.020443537320 | 0.360168434416  | -6.756803814077 |                              |
| C | 1.117751235315  | 0.325999479061  | -5.708378930194 |                              |
| C | -0.545248335266 | 1.384992644864  | -7.567835257181 |                              |
| H | -2.034078684937 | -0.003005299234 | -6.880404379114 |                              |
| C | 1.492585086255  | 1.351235357077  | -6.561893716776 |                              |
| H | 1.827582023535  | -0.062050659962 | -4.986974757204 |                              |
| N | 0.682493865115  | 1.878267440705  | -7.476624739430 |                              |
| H | -1.187217017562 | 1.827161832324  | -8.322781255197 |                              |
| H | 2.493260580168  | 1.767834245308  | -6.511681048489 |                              |

**Table S2 (continued).** B3LYP/6-311G(d,p) Cartesian coordinates and energy for  $S_0$   $1_{C,model-Zn}$ .

|    |                 |                 |                  |
|----|-----------------|-----------------|------------------|
| N  | -2.196041721321 | 2.337581125971  | -0.559925630188  |
| N  | -2.423984969117 | -0.129488112713 | -2.091616623160  |
| N  | -2.532895458624 | 0.830205017102  | 1.910796227267   |
| N  | -2.685520398724 | -1.645145331306 | 0.383143013325   |
| C  | -2.153736820539 | 2.146577804772  | -3.026969245861  |
| C  | -2.146772814470 | 2.871619441566  | -1.819955703612  |
| C  | -2.281637421295 | 0.748280480983  | -3.135804477864  |
| C  | -2.202117393777 | 3.384998129376  | 0.322187160574   |
| C  | -2.541160630895 | -1.384969763563 | -2.630724425082  |
| C  | -2.278078524237 | 3.285564013713  | 1.724662180193   |
| C  | -2.731155752896 | -2.579934479883 | -1.908359778062  |
| C  | -2.122276301483 | 4.316744222341  | -1.730834561373  |
| C  | -2.277122521617 | 0.013928229727  | -4.382310348960  |
| C  | -2.038219121296 | 2.929813535076  | -4.299991726827  |
| C  | -2.430063577542 | 2.087346442643  | 2.449040085703   |
| C  | -2.826595882939 | -2.676262619066 | -0.506891916834  |
| C  | -2.156324940882 | 4.633155460890  | -0.410664009530  |
| C  | -2.436942703374 | -1.299958212468 | -4.071185656217  |
| C  | -2.863813987824 | -1.439091424429 | 2.842988320628   |
| C  | -2.695570911306 | -0.045222093917 | 2.953955372648   |
| C  | -2.887060691669 | -2.162341746183 | 1.635044046231   |
| C  | -2.215863712413 | 4.562033724738  | 2.508320983608   |
| C  | -2.868563017227 | -3.847000473748 | -2.696059124498  |
| C  | -2.499078024614 | 1.998567183765  | 3.891377639999   |
| C  | -3.131355942265 | -3.895778749030 | 0.212091483064   |
| C  | -2.662649607123 | 0.685119596354  | 4.202408617881   |
| C  | -3.168564347265 | -3.579037052151 | 1.532132241336   |
| C  | -3.056830675516 | -2.213764732674 | 4.111801274525   |
| C  | -0.824878788180 | 3.52633870907   | -4.664949261983  |
| C  | -3.140411780353 | 3.085394670685  | -5.149947099465  |
| C  | -3.356351581804 | 5.073022275146  | 3.140529610471   |
| C  | -1.015066558949 | 5.273651372099  | 2.621876755304   |
| C  | -1.848415451973 | -4.806398512859 | -2.691546426771  |
| C  | -4.020893442053 | -4.102493452152 | -3.450001183570  |
| C  | -0.714881322652 | 4.254835371687  | -5.847380732407  |
| C  | -3.032604668701 | 3.816115207874  | -6.331148791353  |
| C  | -2.049134550054 | -3.058008788555 | 4.5945282856659  |
| C  | -4.249001188528 | -2.113699436859 | 4.839980032945   |
| C  | -1.818917659864 | 4.402355561525  | -6.684362370722  |
| C  | -3.297874320857 | 6.260869943726  | 3.866042040852   |
| C  | -0.954482433337 | 6.460197096096  | 3.349433258842   |
| C  | -1.974240946389 | -5.985834754362 | -3.422317509863  |
| C  | -4.149333269545 | -5.28269962594  | -4.178950592803  |
| C  | -2.096207872425 | 6.957879582145  | 3.973909797471   |
| C  | -3.125691290377 | -6.227950763725 | -4.168459899446  |
| C  | -2.226126352393 | -3.779308402805 | 5.773278836655   |
| C  | -4.428451923508 | -2.836601525358 | 6.017263727376   |
| C  | -3.416924004965 | -3.671056625971 | 6.488460314174   |
| H  | -2.104689370531 | 4.994602397178  | -2.568981752079  |
| H  | -2.162846665501 | 0.446892052458  | -5.363029200350  |
| H  | -2.171903243339 | 5.617379426550  | 0.029060687660   |
| H  | -2.477008570902 | -2.135119198789 | -4.751774804998  |
| H  | -2.427938206622 | 2.830396492343  | 4.573501177848   |
| H  | -3.314683031376 | -4.857972980130 | -0.238334628966  |
| H  | -2.749108871358 | 0.249252928811  | 5.184680838684   |
| H  | -3.387633660162 | -4.234637512258 | 2.359467445345   |
| H  | 0.036535342118  | 3.411525289880  | -4.016626639464  |
| H  | -4.087665872651 | 2.635731503117  | -4.874657028935  |
| H  | -4.294169595577 | 4.536275655066  | 3.053084345798   |
| H  | -0.124648285890 | 4.887573886956  | 2.138539115534   |
| H  | -0.950550624930 | -4.619783134096 | -2.1134149770981 |
| H  | -4.821790106466 | -3.371893876954 | -3.454913987089  |
| H  | 0.234513247814  | 4.705629626787  | -6.115040661593  |
| H  | -3.898879283662 | 3.930123379935  | -6.973558058881  |
| H  | -1.12055550754  | -3.142645833066 | 4.041320627126   |
| H  | -5.040263810427 | -1.470195502754 | 4.472469479648   |
| H  | -1.734530186554 | 4.970540810449  | -7.603967978747  |
| H  | -4.193094241807 | 6.643343480043  | 4.343961663988   |
| H  | -0.014247153528 | 6.994806041412  | 3.429427258505   |
| H  | -1.171439864429 | -6.714954835588 | -3.409591350931  |
| H  | -5.051724711959 | -5.464789746634 | -4.752219722861  |
| H  | -2.050272287595 | 7.882093563471  | 4.539018205878   |
| H  | -3.225114372013 | -7.146340193785 | -4.736171253727  |
| H  | -1.432248348483 | -4.424511208858 | 6.133380583630   |
| H  | -5.360899416132 | -2.750125007355 | 6.564203827351   |
| H  | -3.556062027976 | -4.233287443012 | 7.405067098352   |
| Zn | -2.195070351026 | 0.319153190614  | -0.075202796837  |
| C  | 7.062425903969  | 1.771523573780  | 1.686598605631   |
| C  | 8.453503233667  | 1.731640370527  | 1.816007135229   |
| C  | 9.211083351940  | 0.658981998829  | 1.334613539854   |
| C  | 8.605897672453  | -0.456983454169 | 0.763860444212   |
| C  | 6.356056248376  | 0.704639628005  | 1.135342125774   |
| C  | 9.307807697109  | -1.523800324148 | 0.193861202932   |
| C  | 8.649744283575  | -2.59335556925  | -0.404797730431  |
| C  | 7.267067870943  | -2.599240311121 | -0.618443136444  |
| C  | 6.567375504317  | -3.683474016480 | -1.140170441045  |
| C  | 5.175531520620  | -3.667100241626 | -1.226360879413  |
| C  | 4.409283704454  | -2.590760042243 | -0.761571472405  |
| C  | 4.996158120106  | -1.435751624764 | -0.253923602595  |
| C  | 4.288347509795  | -0.334776507650 | 0.284958958713   |
| C  | 4.981395245653  | 0.723123762893  | 0.899684963546   |
| C  | 7.090483280457  | -0.605046270454 | 0.886183287513   |
| C  | 6.518162501188  | -1.290358298538 | -0.373241708188  |
| C  | 6.858735200342  | -1.465889758242 | 2.177968929315   |
| C  | 6.747801918488  | -0.435259871186 | -1.668665303086  |
| H  | 6.524190368180  | 2.668146763859  | 1.978414692033   |
| H  | 10.294969930559 | 0.716060273661  | 1.362855663227   |
| H  | 7.112207568879  | -4.577828922741 | -1.426618025701  |
| H  | 3.331042862941  | -2.691480701792 | -0.754507283065  |
| H  | 8.965903642138  | 2.586814404756  | 2.242653454166   |
| H  | 4.661781333557  | -4.543985734410 | -1.604684565939  |
| H  | 10.392142990402 | -1.524178230152 | 0.248892242836   |
| H  | 9.224613045504  | -3.458848513335 | -0.735868675077  |
| H  | 4.420570556018  | 1.601902401347  | 1.202640386276   |
| H  | 7.359176287314  | -2.431816113215 | 2.101275934614   |
| H  | 5.794607722229  | -1.632230372796 | 2.351773288962   |
| H  | 7.811224842318  | -0.269184809365 | -1.845138046588  |
| H  | 6.246547979129  | 0.530774669540  | -1.596864733091  |
| H  | 7.268927343145  | -0.931895505651 | 3.036619161918   |
| H  | 6.338001482532  | -0.974737794204 | -2.524374962027  |
| C  | 2.809193229581  | -0.226294068888 | 0.194104491299   |
| C  | 2.116507565776  | -0.373084796921 | -1.015478599305  |
| C  | 2.039730786906  | 0.085010430680  | 1.322979774649   |
| C  | 0.738323174736  | -0.214011696305 | -1.043932784661  |
| H  | 2.648991735686  | -0.587528360478 | -1.933254814727  |
| C  | 0.663784623511  | 0.223632809272  | 1.204875673990   |
| H  | 2.508838291511  | 0.203860070116  | 2.291957615407   |
| N  | 0.011125719632  | 0.077561773974  | 0.043895194010   |
| H  | 0.183882281205  | -0.315453557566 | -1.969551072231  |
| H  | 0.049642500035  | 0.457925007893  | 2.066499745721   |

B3LYP energy:

$E(S_0) = -4635.239887$  a.u.

CAM-B3LYP energy:

$E(S_0) = -4633.680231$  a.u.



**Table S2 (continued).** B3LYP/6-311G(d,p) Cartesian coordinates and energy for  $S_0$   $1_{o,model-Zn}$ .

|    |                 |                 |                 |
|----|-----------------|-----------------|-----------------|
| N  | -2.353983449048 | 1.764632615062  | -1.362120533084 |
| N  | -2.212510509311 | -1.076473025922 | -1.992270339278 |
| N  | -2.789276375881 | 1.116404135267  | 1.444118822788  |
| N  | -2.571764464938 | -1.722377482312 | 0.825251268488  |
| C  | -2.054090124761 | 0.785827342744  | -3.615282770338 |
| C  | -2.228613408363 | 1.860416503169  | -2.722372288618 |
| C  | -2.048168488036 | -0.576502482313 | -3.258635529310 |
| C  | -2.541078944783 | 3.034046477429  | -0.883788507003 |
| C  | -2.170121655629 | -2.443896890338 | -2.087924810857 |
| C  | -2.745116172932 | 3.389001689914  | 0.463464471367  |
| C  | -2.320649831076 | -3.350872935458 | -1.021180345093 |
| C  | -2.342072388498 | 3.247972311857  | -3.12077250621  |
| C  | -1.863538568534 | -1.671236472542 | -4.186324722294 |
| C  | -1.885062814071 | 1.119469719761  | -5.067105612493 |
| C  | -2.856186903078 | 2.483144482467  | 1.536169435003  |
| C  | -2.536158849095 | -2.996392247150 | 0.324360365158  |
| C  | -2.535005894895 | 3.971265673128  | -1.987723626006 |
| C  | -1.939037715300 | -2.821442445103 | -3.465344534416 |
| C  | -2.995625612518 | -0.747550256064 | 3.060114090840  |
| C  | -2.968220287217 | 0.615855597421  | 2.708337245561  |
| C  | -2.839472598329 | -1.822713987591 | 2.164432649415  |
| C  | -2.877601332420 | 4.848919149346  | 0.777149566995  |
| C  | -2.270925415312 | -4.813356714324 | -1.347296179523 |
| C  | -3.054512792229 | 2.861492958953  | 2.918427721594  |
| C  | -2.792845101856 | -3.941501023058 | 1.391056178829  |
| C  | -3.123322966216 | 1.711383451174  | 3.640376848185  |
| C  | -2.979505850101 | -3.218191513745 | 2.525180933256  |
| C  | -3.234498614805 | -1.083387138124 | 4.501539614478  |
| C  | -0.697062558254 | 1.694863165872  | -5.534720481828 |
| C  | -2.911152945562 | 0.867060637644  | -5.986243040706 |
| C  | -4.116740197692 | 5.397962160001  | 1.130181159192  |
| C  | -1.764467425051 | 5.696829659032  | 0.720099787579  |
| C  | -1.170056357637 | -5.593143561565 | -0.971677168034 |
| C  | -3.324793120651 | -5.432419715321 | -2.031028539983 |
| C  | -0.537415503000 | 2.006298818431  | -6.88237997782  |
| C  | -2.753911420671 | 1.180564710070  | -7.334511662632 |
| C  | -2.201619561474 | -1.594140945522 | 5.297442534195  |
| C  | -4.495200594437 | -0.898230279007 | 5.082749559467  |
| C  | -1.565845072942 | 1.750309508113  | -7.787672768136 |
| C  | -4.239409028525 | 6.755400664698  | 1.418427887304  |
| C  | -1.885108600595 | 7.053979515627  | 1.010840434350  |
| C  | -1.121979384186 | -6.952424531017 | -1.273368793307 |
| C  | -3.279352415525 | -6.792148360533 | -2.330852010200 |
| C  | -3.123532604647 | 7.587835608375  | 1.360826215474  |
| C  | -2.177073169996 | -7.556532427382 | -1.953812075951 |
| C  | -2.421076523990 | -1.907979453717 | 6.636946046253  |
| C  | -4.716835328026 | -1.214263099332 | 6.421329878519  |
| C  | -3.679991249219 | -1.719245183078 | 7.203273337105  |
| H  | -2.302247577127 | 3.612597629405  | -4.134569911476 |
| H  | -1.695143918669 | -1.571137672241 | -5.246479902082 |
| H  | -2.682110647775 | 5.036058067961  | -1.904808196530 |
| H  | -1.843533174022 | -3.831708654984 | -3.829461475270 |
| H  | -3.12722811706  | 3.872330135785  | 3.286173033746  |
| H  | -2.845094953607 | -5.012428879902 | 1.278332926835  |
| H  | -3.262465972450 | 1.612161013300  | 4.704858248939  |
| H  | -3.212651190586 | -3.588915954608 | 3.510335218797  |
| H  | 0.105832302352  | 1.892931023904  | -4.833541418163 |
| H  | -3.838963811067 | 4.029520902584  | -5.635519682848 |
| H  | -4.988001791168 | 4.754069341405  | 1.169611217423  |
| H  | -0.799141190483 | 5.283781685038  | 0.449729113525  |
| H  | -0.346426945359 | -5.125229823147 | -0.444205590603 |
| H  | -4.186401409902 | -4.841447270155 | -2.320250808007 |
| H  | 0.391795953703  | 2.447403527398  | -7.227068033220 |
| H  | -3.562013841362 | 0.982578615063  | -8.030136987173 |
| H  | -1.220376294366 | -1.740057127916 | 4.859966274907  |
| H  | -5.305488797163 | -0.511531573787 | 4.475165478682  |
| H  | -1.442928517706 | 1.993788960692  | -8.837077735071 |
| H  | -5.208583179252 | 7.162871861980  | 1.684473288230  |
| H  | -1.010554606100 | 7.693773255247  | 0.965306884708  |
| H  | -0.258670845491 | -7.538762380503 | -0.978177966884 |
| H  | -4.107702264453 | -7.254638097297 | -2.856261242021 |
| H  | -3.218601692255 | 8.644254916617  | 1.585698050216  |
| H  | -2.141072842275 | -8.614666701596 | -2.187671463881 |
| H  | -1.60736155093  | -2.298415119089 | 7.23293100339   |
| H  | -5.701542497521 | -1.069078288119 | 6.85189966304   |
| H  | -3.852053741752 | -1.964716227909 | 8.245276837442  |
| Zn | -2.217148710624 | 0.028746231363  | -0.232278791859 |
| C  | 6.648785296280  | 2.903468135128  | 0.753197087400  |
| C  | 7.975868577047  | 3.132957695022  | 0.404342643054  |
| C  | 8.868951583258  | 2.065075227219  | 0.433523723670  |
| C  | 8.491201215174  | 0.830383602090  | 0.983649761790  |
| C  | 6.249885011938  | 1.672733384553  | 1.302855026809  |
| C  | 9.264078465248  | -0.377405484050 | 0.587388120167  |
| C  | 8.731069742911  | -1.495563693982 | 0.045680952790  |
| C  | 7.281672093709  | -1.843331795235 | 0.037174911723  |
| C  | 6.901745312990  | -3.050934973677 | 0.637930223318  |
| C  | 5.583836826286  | -3.271013795990 | 1.029977495684  |
| C  | 4.685035094368  | -2.211372551662 | 0.979175573400  |
| C  | 5.040549914063  | -0.999595667705 | 0.363905063514  |
| C  | 4.238132881967  | 0.227049665239  | 0.697047557583  |
| C  | 4.805640797875  | 1.346605601494  | 1.229965648262  |
| C  | 7.245929965957  | 0.728103580301  | 1.643515174183  |
| C  | 6.277691875256  | -0.907172918719 | -0.308194421652 |
| C  | 7.012825678758  | -0.312332446857 | 2.707834739746  |
| C  | 6.509157679153  | 0.134999465281  | -1.374617750628 |
| H  | 5.897112084570  | 3.659794665512  | 0.552339838577  |
| H  | 9.850695423065  | 2.164237201788  | -0.018053170452 |
| H  | 7.661096023108  | -3.797285151921 | 0.847999289560  |
| H  | 3.713676894987  | -2.302629048830 | 1.452088734568  |
| H  | 8.282542114438  | 4.096650001208  | 0.015046126020  |
| H  | 5.291271569967  | -4.218671084945 | 1.466837792201  |
| H  | 10.348058734712 | -0.291200251432 | 0.587637179150  |
| H  | 9.422892352005  | -2.272109447162 | -0.272023967607 |
| H  | 4.136517495903  | 2.180148168109  | 1.427816457813  |
| H  | 6.005530351116  | -0.722664977259 | 2.706674488820  |
| H  | 7.730092887960  | -1.128114177230 | 2.650431588309  |
| H  | 5.723615547504  | 0.888744773512  | -1.380095315392 |
| H  | 7.472892606758  | 0.634251353562  | -1.303215246997 |
| H  | 7.158185610720  | 0.180787364297  | 3.676797574454  |
| H  | 6.481162431531  | -0.373715472749 | -2.345319152687 |
| C  | 2.766838012844  | 0.172972344640  | 0.517631504694  |
| C  | 2.201811864253  | -0.525184029275 | -0.559535674633 |
| C  | 1.869659037722  | 0.811516608143  | 1.386811799696  |
| C  | 0.825809231315  | -0.530991582293 | -0.733822903293 |
| H  | 2.832764289861  | -1.054950417785 | -1.261971663350 |
| C  | 0.506505861094  | 0.750410571533  | 1.139024494504  |
| H  | 2.225014370527  | 1.331612487912  | 2.267387089495  |
| N  | -0.021289250497 | 0.094700343391  | 0.095687687058  |
| H  | 0.371399261865  | -1.054072671914 | -1.567032190976 |
| H  | -0.202557774475 | 1.232555439214  | 1.801732165649  |

B3LYP energy:

$E(S_0) = -4635.207965$  a.u.

**Table S2 (continued).** UB3LYP/6-311G(d,p) Cartesian coordinates and energies for  $S_0$  transition state between  $\mathbf{1}_{c,model-Zn}$  and  $\mathbf{1}_{o,model-Zn}$ .

|    |                 |                 |                 |
|----|-----------------|-----------------|-----------------|
| N  | -2.72279501120  | 1.455558137914  | -0.988704998278 |
| N  | -2.031089758253 | -1.099694293729 | -2.205062565130 |
| N  | -2.903112538716 | 0.162272440847  | 1.615565218005  |
| N  | -2.136850688089 | -2.377262355881 | 0.410992006031  |
| C  | -2.324470765786 | 1.049804847294  | -3.397275900116 |
| C  | -2.677070815308 | 1.855368466699  | -2.297559946756 |
| C  | -2.025070463239 | -0.324981044126 | -3.336640130553 |
| C  | -3.143275857050 | 2.530982012559  | -0.252756835917 |
| C  | -1.711839415744 | -2.377469016532 | -2.587191248685 |
| C  | -3.358586053985 | 2.548368554833  | 1.138678139157  |
| C  | -1.630109351441 | -3.497095762209 | -1.736899375056 |
| C  | -3.087149270052 | 3.240902628026  | -2.393396183070 |
| C  | -1.656826307439 | -1.139944808163 | -4.473932558819 |
| C  | -2.287699991303 | 1.705066109580  | -4.745119967572 |
| C  | -3.240497829918 | 1.436263654929  | 1.994798824529  |
| C  | -1.860862822160 | -3.483118614891 | -0.347941473597 |
| C  | -3.374577625307 | 3.657284598163  | -1.133189251373 |
| C  | -1.464036081770 | -2.404176239526 | -4.012344758923 |
| C  | -2.662902277181 | -1.998586980127 | 2.799338221898  |
| C  | -2.926582368425 | -0.616217698500 | 2.744363585874  |
| C  | -2.326499748304 | -2.807584919824 | 1.697059153921  |
| C  | -3.769302873397 | 3.852089566174  | 1.754158828812  |
| C  | -1.293184054579 | -4.816350229206 | -2.364309661781 |
| C  | -3.455468841505 | 1.469751051560  | 3.425123732950  |
| C  | -1.877741785157 | -4.661895291982 | 0.493059287977  |
| C  | -3.262198043962 | 0.205566655911  | 3.886777632221  |
| C  | -2.164709284305 | -4.245546596307 | 1.753449881060  |
| C  | -2.771457550818 | -2.668774135466 | 4.135942198093  |
| C  | -1.265673198143 | 2.603694576954  | -5.075490823114 |
| C  | -3.275145767710 | 1.436768481897  | -5.701382995842 |
| C  | -5.076923297471 | 4.048129746502  | 2.216006697636  |
| C  | -2.853896573307 | 4.904819379868  | 1.877039019824  |
| C  | -0.042046372616 | -5.409375320669 | -2.154413548064 |
| C  | -2.222088556889 | -5.486402520595 | -3.170287715720 |
| C  | -1.229354948899 | 3.214504737003  | -6.327102187583 |
| C  | -3.241640416728 | 2.049058409250  | -6.952294928724 |
| C  | -1.625942685121 | -3.110749508468 | 4.809491224587  |
| C  | -4.019349742398 | -2.871053007273 | 4.738707163468  |
| C  | -2.217777711869 | 2.939249164676  | -7.269694181481 |
| C  | -5.458190784155 | 5.261293658918  | 2.784893223282  |
| C  | -3.233037581105 | 6.117618211181  | 2.448241948719  |
| C  | 0.273418982245  | -6.635523273367 | -2.735781917788 |
| C  | -1.909051960310 | -6.713889951183 | -3.750037530575 |
| C  | -4.536990898376 | 6.299883110948  | 2.903975424678  |
| C  | -0.659620924524 | -7.292100646812 | -3.535474440563 |
| C  | -1.724035289051 | -3.734064268662 | 6.051586725594  |
| C  | -4.119158065300 | -3.496731326236 | 5.979425653667  |
| C  | -2.971484460949 | -3.929355884169 | 6.640608127538  |
| H  | -3.165396503653 | 3.808041975942  | -3.30623276481  |
| H  | -1.555905037796 | -0.789218151910 | -5.488384401318 |
| H  | -3.731347900988 | 4.627452655132  | -0.826960227775 |
| H  | -1.177070970830 | -3.273816284453 | -4.581293633636 |
| H  | -3.715518736556 | 2.344929346590  | 3.998484757402  |
| H  | -1.714448942003 | -5.672856490065 | 0.155974760642  |
| H  | -3.335769848279 | -0.139256701065 | 4.905597490943  |
| H  | -2.279260991410 | -4.853464795333 | 2.636419830871  |
| H  | -0.493944699284 | 2.818025347332  | -4.344725028408 |
| H  | -4.076475844961 | 0.749441397300  | -5.454965740082 |
| H  | -5.797705344961 | 3.244230731172  | 2.118714127882  |
| H  | -1.838005243537 | 4.765115073755  | 1.524932299585  |
| H  | 0.686700959473  | -4.899439289085 | -1.534389951977 |
| H  | -3.197285143257 | -5.042014968056 | -3.333892216034 |
| H  | -0.427213646174 | 3.904260917265  | -6.565913776189 |
| H  | -0.418398682612 | 1.832744910675  | -7.677543166748 |
| H  | -0.653685051493 | -2.958142083427 | 4.354579477324  |
| H  | -4.914542800727 | -2.541219613803 | 4.223827376713  |
| H  | -2.191063815546 | 3.415432060879  | -8.243442388974 |
| H  | -6.476944395128 | 5.395672322257  | 3.131597481189  |
| H  | -2.508519767398 | 6.919616200367  | 2.538459890800  |
| H  | 1.249333859095  | -7.076727960115 | -2.565305490347 |
| H  | -2.643726484842 | -7.219978235420 | -4.366676296335 |
| H  | -4.833075002877 | 7.244014777888  | 3.347201528280  |
| H  | -0.415488414889 | -8.247139247982 | -3.987068243512 |
| H  | -0.824958269714 | -4.065538570001 | 6.559641371495  |
| H  | 5.094927181317  | -3.649260658992 | 6.427461412435  |
| H  | -3.048799614847 | -4.415758435796 | 7.606566287145  |
| Zn | -2.187146790777 | 0.409512130662  | -0.250558277454 |
| C  | 8.372822668563  | 3.632682408430  | 1.398738209184  |
| C  | 8.203173048771  | 2.265489469477  | 1.239255667745  |
| C  | 6.916133606432  | 1.661846098685  | 1.583744404578  |
| C  | 5.774901035125  | 2.567048338958  | 1.688869001165  |
| C  | 6.007041935863  | 3.93300620126   | 1.845579448738  |
| C  | 7.300149166575  | 4.461114387934  | 1.773295139703  |
| C  | 4.433756008870  | 2.067768179192  | 1.468374974252  |
| C  | 4.112158228109  | 0.946681660436  | 0.741863495849  |
| C  | 5.168453522417  | 0.074175952938  | 0.177315955626  |
| C  | 5.028915529168  | -1.307891551521 | 0.146012337784  |
| C  | 6.106523268933  | -2.146014246588 | -0.178634805542 |
| C  | 7.389834891298  | -1.603529034600 | -0.324478471761 |
| C  | 7.599176913387  | -0.231957616627 | -0.267480082951 |
| C  | 6.451346888854  | 0.667917171085  | -0.180961679983 |
| H  | 9.342412321758  | 4.073965769100  | 1.188911896130  |
| C  | 9.223858476460  | 1.437609900808  | 0.604420517723  |
| H  | 5.160781399985  | 4.60097106358   | 1.980065969394  |
| H  | 7.460815909005  | 5.523019392541  | 1.915035757660  |
| H  | 3.621685028441  | 2.712643293915  | 1.790549496771  |
| H  | 4.074053891711  | -1.752053946143 | 0.403572432811  |
| H  | 5.960009256535  | -3.218060772908 | -0.230252610440 |
| H  | 8.244535295192  | -2.264571598279 | -0.431527289756 |
| C  | 8.945103870599  | 0.316470738901  | -0.113133603061 |
| C  | 6.954103960049  | 0.508119476552  | 2.581311137841  |
| C  | 6.419516535124  | 1.826210437201  | -1.174995237437 |
| H  | 9.769266629860  | -0.252313650111 | -0.533974491402 |
| H  | 10.252507757103 | 1.782301317624  | 0.657060425301  |
| H  | 7.183159900795  | 0.919127470108  | 3.570370703141  |
| H  | 7.726075490566  | -0.219678353858 | 2.334410996433  |
| H  | 5.994113815374  | -0.003455058286 | 2.646624812679  |
| H  | 5.642551732909  | 2.550216873121  | -0.932490021122 |
| H  | 6.200883053778  | 1.418851467189  | -2.167835198856 |
| H  | 7.376594619829  | 2.343027637212  | -1.230429184598 |
| C  | 2.688540199783  | 0.611127353918  | 0.530243689252  |
| C  | 2.227207244613  | 0.089300802919  | -0.688987930496 |
| C  | 1.718519829878  | 0.821701092869  | 1.523262870128  |
| C  | 0.876321988103  | -0.169884726954 | -0.862747046045 |
| H  | 2.915893142406  | -0.099423206578 | -1.502390475379 |
| C  | 0.387836099111  | 0.531038086870  | 1.263796757476  |
| H  | 2.001506385940  | 1.186334282438  | 2.502696035671  |
| N  | -0.041986215455 | 0.042826728585  | 0.091416583380  |
| H  | 0.500501504426  | -0.561700074835 | -1.800641792835 |
| H  | -0.373266274563 | 0.681803710624  | 2.020400143373  |

UB3LYP energies:

$$E(S_0) = -4635.170076 \text{ a.u.}$$

$$\langle S^2 \rangle = 1.019107$$

$$E(T_1) = -4635.164298 \text{ a.u.}$$

$$\langle S^2 \rangle = 2.040284$$

**Table S2 (continued).** TD-CAM-B3LYP/6-311G(d,p) Cartesian coordinates and energy for  $S_1(\text{LE})$   $1_{\text{c,model}}\text{-Zn}$ .

|    |                  |                 |                 |
|----|------------------|-----------------|-----------------|
| N  | -2.179434131898  | 2.320272338092  | -0.558201436505 |
| N  | -2.403021791553  | -0.135144083221 | -2.077013417494 |
| N  | -2.512133309435  | 0.825700554593  | 1.899613548815  |
| N  | -2.675003602578  | -1.636537201139 | 0.384048357326  |
| C  | -2.122999703374  | 2.126298762277  | -3.011549499756 |
| C  | -2.117746609584  | 2.848314670597  | -1.811915388639 |
| C  | -2.256829954850  | 0.736146781732  | -3.116198587579 |
| C  | -2.177923940637  | 3.363107844584  | 0.317559192638  |
| C  | -2.525030442478  | -1.384052442659 | -2.611377459526 |
| C  | -2.255704186369  | 3.268055217464  | 1.712345560814  |
| C  | -2.716593584181  | -2.570991364320 | -1.892895326642 |
| C  | -2.077872425820  | 4.290058500777  | -1.726633470717 |
| C  | -2.256248519380  | 0.003291194956  | -4.359558798738 |
| C  | -1.999135761039  | 2.904542584602  | -4.282474649574 |
| C  | -2.410648795652  | 2.076973339819  | 2.432758103703  |
| C  | -2.811392447954  | -2.664145085038 | -0.499060456922 |
| C  | -2.115202874057  | 4.607357576922  | -0.414246000575 |
| C  | -2.421656720299  | -1.302484043653 | -4.048673562124 |
| C  | -2.840963384660  | -1.430192697818 | 2.831527988411  |
| C  | -2.674408268940  | -0.043689495361 | 2.937979115768  |
| C  | -2.866955900686  | -2.149866125625 | 1.630727908783  |
| C  | -2.191042302018  | 4.542013358139  | 2.492709135167  |
| C  | -2.855253600637  | -3.836532205747 | -2.677357563086 |
| C  | -2.482200488931  | 1.991962446805  | 3.871765072193  |
| C  | -3.105432428335  | -3.882273198485 | 0.220176058016  |
| C  | -2.644507922054  | 0.685844479630  | 4.182934017647  |
| C  | -3.1392606635243 | -3.565366699956 | 1.532782890338  |
| C  | -3.029462878358  | -2.201213380032 | 4.098874438903  |
| C  | -0.782660882610  | 3.477240829513  | -4.648901312761 |
| C  | -3.097203185033  | 3.075850575490  | -5.123461992329 |
| C  | -3.329270879568  | 5.059455196765  | 3.108453352206  |
| C  | -0.990769211736  | 5.239221512429  | 2.616642721769  |
| C  | -1.835802276864  | -4.786693911170 | -2.680083970269 |
| C  | -4.007654729817  | -4.093279318650 | -3.418016949034 |
| C  | -0.665158112986  | 4.200567399819  | -5.827244435732 |
| C  | -2.982243411882  | 3.800672600352  | -6.301048841298 |
| C  | -2.017284170357  | -3.026348971215 | 4.585434307415  |
| C  | -4.221050597139  | -2.113381293548 | 4.816373903182  |
| C  | -1.765221297573  | 4.364569583263  | -6.656958768064 |
| C  | -3.269205486368  | 6.242947488462  | 3.830244565740  |
| C  | -0.928179175471  | 6.421839694902  | 3.339784636754  |
| C  | -1.962736506149  | -5.962147952046 | -3.406471685768 |
| C  | -4.137422778901  | -5.268980794152 | -4.143350924776 |
| C  | -2.067854481514  | 6.927381879596  | 3.948900665030  |
| C  | -3.114586756140  | -6.206827992261 | -4.140507045151 |
| C  | -2.189832134005  | -3.743629229782 | 5.760683933179  |
| C  | -4.396303892251  | -2.831526226169 | 5.990609758346  |
| C  | -3.380508433593  | -3.648321998478 | 6.466851985648  |
| H  | -2.046764204263  | 4.964123893704  | -2.566997561646 |
| H  | -2.140689559131  | 0.436765847693  | -5.339508278773 |
| H  | -2.120694922709  | 5.591122365073  | 0.025882481134  |
| H  | -2.466947216077  | -2.139301163050 | -4.726330635255 |
| H  | -2.413219529307  | 2.826219332148  | 4.550581803992  |
| H  | -3.282414336240  | -4.845433452486 | -0.229866742942 |
| H  | -2.733292167013  | 0.249510317969  | 5.164401067474  |
| H  | -3.348978663181  | -4.219289675253 | 2.363410978107  |
| H  | 0.077200172743   | 3.348922315441  | -4.002029789894 |
| H  | -0.4049076346114 | 2.640084633917  | -4.844001156313 |
| H  | -4.268837550535  | 4.528429807120  | 3.012276761089  |
| H  | -0.100179129522  | 4.844693114878  | 2.141812658804  |
| H  | -0.935728239291  | -4.596137789747 | -2.107531613627 |
| H  | -4.809012887389  | -3.364008883675 | -3.416845144366 |
| H  | 0.289508387380   | 4.636008738784  | -6.098175029858 |
| H  | -3.847725887517  | 3.927696244443  | -6.940679683285 |
| H  | -1.086735480632  | -3.100677355489 | 4.035149034504  |
| H  | -5.016620634634  | -1.479748248442 | 4.442715370122  |
| H  | -1.674825905228  | 4.930302686794  | -7.576579265846 |
| H  | -4.165256836860  | 6.632924701734  | 4.298563183160  |
| H  | 0.014493306409   | 6.949044122571  | 3.428437940561  |
| H  | -1.158434399876  | -6.688441440202 | -3.399689024703 |
| H  | -5.042541586203  | -5.453880517798 | -4.709812898816 |
| H  | -2.020381715466  | 7.851395292217  | 4.512696582639  |
| H  | -3.215305395035  | -7.124907727995 | -4.706985505294 |
| H  | -1.390582284556  | -4.377699338885 | 6.126136615126  |
| H  | -5.331233042247  | -2.754759054144 | 6.533136148865  |
| H  | -3.516730136502  | -4.208978919791 | 7.383931667631  |
| Zn | -2.185398520064  | 0.314671964739  | -0.073889635579 |
| C  | 6.999351166682   | 1.758870197142  | 1.734906092450  |
| C  | 8.389291553794   | 1.735954037644  | 1.849223886361  |
| C  | 9.146190390689   | 0.675702056319  | 1.349691154945  |
| C  | 8.535978245649   | -0.441173948086 | 0.772353676560  |
| C  | 6.302569827368   | 0.681315131929  | 1.179238306360  |
| C  | 9.245866140135   | -1.482167008427 | 0.163942419459  |
| C  | 8.595663261460   | -2.542137031583 | -0.467169593238 |
| C  | 7.211022715058   | -2.547617155513 | -0.675257871600 |
| C  | 6.522358619243   | -3.646557843029 | -1.190799790617 |
| C  | 5.131426701408   | -3.654225795048 | -1.249204919982 |
| C  | 4.366533352077   | -2.589137929261 | -0.767981777303 |
| C  | 4.957562293996   | -1.422408851000 | -0.276755463658 |
| C  | 4.241679366945   | -0.337300994485 | 0.285400579406  |
| C  | 4.929493989992   | 0.702717494990  | 0.936429681848  |
| C  | 7.036316563567   | -0.605773100602 | 0.893115043821  |
| C  | 6.462952945166   | -1.261202720894 | -0.394174280141 |
| C  | 6.793753478766   | -1.530730467365 | 2.123316424754  |
| C  | 6.704957687174   | -0.340602051081 | -1.627981122750 |
| H  | 6.447882222894   | 2.639609909367  | 2.043754829915  |
| H  | 10.228694713585  | 0.731220592075  | 1.370426703155  |
| H  | 7.080934251356   | -4.524546993693 | -1.494781202708 |
| H  | 3.291045609151   | -2.696606519497 | -0.735745906499 |
| H  | 8.897141138862   | 2.58774507158   | 2.285154182190  |
| H  | 4.622489794266   | -4.534109809942 | -1.623837987030 |
| H  | 10.329693537429  | -1.465638482026 | 0.200360838447  |
| H  | 9.173718193087   | -3.393278342684 | -0.810619643356 |
| H  | 4.368979104724   | 1.580307698280  | 1.239777649076  |
| H  | 7.291927461190   | -2.490349084794 | 1.985523784267  |
| H  | 5.727067635532   | -1.705540564220 | 2.266035870551  |
| H  | 7.771058676413   | -0.166562593059 | -1.772484446971 |
| H  | 6.206779887362   | 0.619756097060  | -1.494996923883 |
| H  | 7.192320365107   | -1.055200047339 | 3.019836526962  |
| H  | 6.306763746747   | -0.820498224028 | -2.522633190698 |
| C  | 2.770375797935   | -0.232655250774 | 0.197621437648  |
| C  | 2.076078361423   | -0.425468145565 | -0.998648348233 |
| C  | 2.009495809161   | 0.125408388635  | 1.311731208552  |
| C  | 0.704815638452   | -0.261998225854 | -1.028813872126 |
| H  | 2.604407986805   | -0.678268421784 | -1.098070938628 |
| C  | 0.639320658355   | 0.262251457467  | 1.193342559802  |
| H  | 2.481795235549   | 0.279795346825  | 2.273225722968  |
| N  | -0.012873002185  | 0.073150916848  | 0.045625663404  |
| H  | 0.145845971943   | -0.395926140140 | -1.947327934584 |
| H  | 0.027627624303   | 0.530603508264  | 2.046524055307  |

TD-CAM-B3LYP energy:

$$E(S_1) = -4633.605217 \text{ a.u.}$$

**Table S2 (continued).** TD-CAM-B3LYP/6-311G(d,p) Cartesian coordinates and energy for  $S_2(Q)$   $1_{c,model-Zn}$ .

|    |                 |                 |                 |
|----|-----------------|-----------------|-----------------|
| N  | -2.181743787396 | 2.343485358953  | -0.557790845163 |
| N  | -2.421112865013 | -0.126165985500 | -2.069537589977 |
| N  | -2.550019478024 | 0.828692315991  | 1.895808232037  |
| N  | -2.672178401792 | -1.653726472619 | 0.390912455801  |
| C  | -2.126173502366 | 2.139266140104  | -3.014875148929 |
| C  | -2.151887242290 | 2.877090435156  | -1.813115530711 |
| C  | -2.231640340976 | 0.743116774626  | -3.11187063934  |
| C  | -2.214352484246 | 3.389347439374  | 0.317653307355  |
| C  | -2.485030339726 | -1.384786222764 | -2.606103828161 |
| C  | -2.268108726050 | 3.278752370223  | 1.722707349812  |
| C  | -2.694086322542 | -2.577179488492 | -1.896031742326 |
| C  | -2.177412144706 | 4.313843772911  | -1.729238461330 |
| C  | -2.137059445116 | 0.000662751783  | -4.344345803581 |
| C  | -1.993504992450 | 2.910901331858  | -4.282490308710 |
| C  | -2.403837712210 | 2.078429747388  | 2.437107900163  |
| C  | -2.827808526609 | -2.679044121773 | -0.49558985294  |
| C  | -2.215767140912 | 4.630770865734  | -0.411045908842 |
| C  | -2.292472461368 | -1.307937818958 | -4.033638917522 |
| C  | -2.859403969424 | -1.435017032215 | 2.840378047562  |
| C  | -2.673288784180 | -0.047662985789 | 2.941414694232  |
| C  | -2.903496776844 | -2.165242264836 | 1.634456679777  |
| C  | -2.194395970935 | 4.544175522086  | 2.505767736264  |
| C  | -2.805638728802 | -3.838349150152 | -2.681395184363 |
| C  | -2.398819955424 | 1.980237977023  | 3.876235330717  |
| C  | -3.180852857077 | -3.881646857687 | 0.212379635136  |
| C  | -2.564927575251 | 0.672827743730  | 4.186448052472  |
| C  | -3.227809820878 | -3.563718678741 | 1.530086235810  |
| C  | -3.043676487743 | -2.200993776279 | 4.104966774881  |
| C  | -0.827286499962 | 3.623397646004  | -4.563006447276 |
| C  | -3.032372304587 | 2.942654340399  | -5.212870051181 |
| C  | -3.283234835407 | 4.984841102487  | 3.258187778652  |
| C  | -1.034476748554 | 5.319365564146  | 2.497427877440  |
| C  | -1.851432773751 | -4.847255165441 | -2.547034213585 |
| C  | -3.868117132915 | -4.041444407413 | -3.562232926203 |
| C  | -0.699973297714 | 3.409089512109  | -5.743082851584 |
| C  | -2.908396779198 | 3.665098506703  | -6.390666618345 |
| C  | -2.098893797286 | -3.144439693035 | 4.509595769814  |
| C  | -4.165562962698 | -1.996403589689 | 4.908340488388  |
| C  | -1.740976938990 | 4.364939384693  | -6.660738549965 |
| C  | -3.213896584968 | 6.165791870681  | 3.982789135062  |
| C  | -0.962048382990 | 6.497117191077  | 3.226292752184  |
| C  | -1.951720167053 | -6.021841834379 | -3.277672140032 |
| C  | -3.972631633441 | -5.218395060792 | -4.289094477166 |
| C  | -2.052351040734 | 6.924890030029  | 3.971024136875  |
| C  | -3.013634407997 | -6.211768839422 | -4.150951660313 |
| C  | -2.266688021602 | -3.857553622390 | 5.687270216000  |
| C  | -4.337369255552 | -2.713596454008 | 6.08327637481   |
| C  | -3.387489740820 | -3.64507726493  | 6.477854435190  |
| H  | -2.191204085801 | 4.989148368455  | -2.568511999302 |
| H  | -1.961102712357 | 0.426933255259  | -5.318123777422 |
| H  | -2.267108328178 | 5.613395189292  | 0.027625792153  |
| H  | -2.267074633775 | -2.148812006729 | -4.706798492670 |
| H  | -2.271676468767 | 2.804676031990  | 4.558153767732  |
| H  | -3.391835918329 | -4.835593835963 | -0.241579933570 |
| H  | -2.598513055800 | 0.231158080163  | 5.168644456272  |
| H  | -3.483808393487 | -4.209491062955 | 2.353521913536  |
| H  | -0.012959568080 | 3.605031080365  | -3.848507719690 |
| H  | -3.947035994698 | 2.402164406678  | -5.000961895360 |
| H  | -4.193283465778 | 4.397129040629  | 3.263410822454  |
| H  | -0.181939059807 | 4.986588196933  | 1.917427531913  |
| H  | -1.021381582627 | -4.700645870610 | -1.866246885359 |
| H  | -4.621585543216 | -3.270082129679 | -3.666541595063 |
| H  | 0.216691707622  | 4.881753874304  | -5.946999476891 |
| H  | -3.729168552491 | 3.683876052583  | -7.097967196029 |
| H  | -1.222581827897 | -3.311019161602 | 3.894531158269  |
| H  | -4.911484147416 | -1.274318810144 | 4.598775722724  |
| H  | -1.643274141721 | 4.927711503519  | -7.581397459516 |
| H  | -4.072731428859 | 6.4955388551768 | 4.55467924854   |
| H  | -0.049822619980 | 7.082004456897  | 3.213451059775  |
| H  | -1.196655248487 | -6.791045506099 | -3.165295507460 |
| H  | -4.809285057847 | -5.360772311729 | -4.962907795603 |
| H  | -1.997476305882 | 7.846391568832  | 4.538207576590  |
| H  | -3.094243140092 | -7.130360772896 | -4.719768901565 |
| H  | -1.518019753867 | -4.508590302333 | 5.98067457204   |
| H  | -5.219155331895 | -2.546129498650 | 6.690535992095  |
| H  | -3.520615410427 | -4.203976753102 | 7.296429725016  |
| Zn | -2.190724897042 | 0.319269723677  | -0.069575074849 |
| C  | 7.000542273228  | 1.755460195801  | 1.646311529836  |
| C  | 8.409330829622  | 1.711832456931  | 1.778145370673  |
| C  | 9.148033509972  | 0.656961045822  | 1.307547409717  |
| C  | 8.529185209779  | -0.463769528224 | 0.718298963924  |
| C  | 6.304008626802  | 0.702302719538  | 1.122829535386  |
| C  | 9.214714627839  | -1.500429569808 | 0.135881675685  |
| C  | 8.537975657967  | -2.589789807025 | -0.456610931849 |
| C  | 7.178917254480  | -2.576840793541 | -0.651384364503 |
| C  | 6.458612006346  | -3.663217178996 | -1.186572793939 |
| C  | 5.091386054018  | -3.647280356723 | -1.231695367857 |
| C  | 4.331723825496  | -2.564211714873 | -0.721210981206 |
| C  | 4.925759468709  | -1.433057946867 | -0.237996210710 |
| C  | 4.221249836745  | -0.316135400067 | 0.316734060287  |
| C  | 4.906230177672  | 0.715476641986  | 0.917135993628  |
| C  | 7.022731437912  | -0.604270847759 | 0.861108688783  |
| C  | 6.434415519597  | -1.277571950977 | -0.387403563033 |
| C  | 6.804682202812  | -1.464493136311 | 2.143130489220  |
| C  | 6.637479201476  | -0.416823160245 | -1.670306563488 |
| H  | 6.470543973664  | 2.658440603049  | 1.930353711333  |
| H  | 10.231564846178 | 0.696427150166  | 1.342566672714  |
| H  | 7.003391485671  | -4.543507336387 | -1.510692830301 |
| H  | 3.254839596715  | -2.667744952456 | -0.684070259996 |
| H  | 8.918092439976  | 2.566976520551  | 2.207206965109  |
| H  | 4.561574072952  | -4.511895016507 | -1.613760306615 |
| H  | 10.299300357828 | -1.496224702778 | 0.158279257744  |
| H  | 9.106810946785  | -3.454113267655 | -0.782592261862 |
| H  | 4.353841626128  | 1.588159810752  | 1.249683894638  |
| H  | 7.291452127152  | -2.434781477800 | 2.049030035377  |
| H  | 5.743472174262  | -1.619464166249 | 2.338361864842  |
| H  | 7.696471591689  | -0.241767914190 | -1.858322478048 |
| H  | 6.130295162061  | 0.544362081549  | -1.587596178330 |
| H  | 7.238567094557  | -0.941426908512 | 2.995848982895  |
| H  | 6.221394206575  | -0.954138917709 | -2.523402256433 |
| C  | 2.744009046374  | -0.211042221280 | 0.220427937385  |
| C  | 2.06752379763   | -0.334751163909 | -0.992694962858 |
| C  | 1.97278536396   | 0.068218219311  | 1.346748261365  |
| C  | 0.695202844914  | -0.178237668474 | -1.028702805708 |
| H  | 2.608377462756  | -0.533947783164 | -1.908162113303 |
| C  | 6.02295001901   | 0.206664575046  | 1.222748506190  |
| H  | 2.436406663909  | 0.164904335291  | 2.319874928169  |
| N  | -0.034556194603 | 0.086316934334  | 0.057458313499  |
| H  | 0.147004086245  | -0.261527062828 | -1.959382521085 |
| H  | -0.018889354771 | 0.420136513380  | 2.084061563824  |

TD-CAM-B3LYP energy:

$E(S_1-Q)^* = -4633.603322$  a.u.

\* The Q state has crossed the LE state at its optimized geometry (see Fig. 8a).

**Table S2 (continued).** TD-CAM-B3LYP/6-311G(d,p) Cartesian coordinates and energy for  $S_4(Z)$   $1_{c,model}Zn$  (CPD\*).

|    |                 |                 |                 |
|----|-----------------|-----------------|-----------------|
| N  | -2.175062072205 | 2.324324357642  | -0.547589511115 |
| N  | -2.377449615870 | -0.129930906163 | -2.071453480104 |
| N  | -2.533891514786 | 0.826825334475  | 1.904447673881  |
| N  | -2.674662175230 | -1.634270167780 | 0.384588714837  |
| C  | -2.088672912641 | 2.132757748819  | -3.000293620211 |
| C  | -2.098527317331 | 2.853583545744  | -1.799994721228 |
| C  | -2.220085889639 | 0.742637584804  | -3.107953614336 |
| C  | -2.185679038714 | 3.366415092190  | 0.329066519368  |
| C  | -2.492773849765 | -1.378322659295 | -2.608646127400 |
| C  | -2.280249045217 | 3.269948751347  | 1.722696412161  |
| C  | -2.690605888642 | -2.566301422501 | -1.893779358336 |
| C  | -2.061289321056 | 4.295266282309  | -1.712927789727 |
| C  | -2.205363607645 | 0.011239896905  | -4.352068356071 |
| C  | -1.950491614860 | 2.912464853963  | -4.268869130810 |
| C  | -2.441374618869 | 2.077808092352  | 2.440032690542  |
| C  | -2.799857338214 | -2.661194377978 | -0.501038797677 |
| C  | -2.115391422666 | 4.611358061523  | -0.400835789847 |
| C  | -2.373543800700 | -1.294980570708 | -4.044595667444 |
| C  | -2.867349156150 | -1.430906886548 | 2.830392120111  |
| C  | -2.705411015956 | -0.04411185834  | 2.940078318870  |
| C  | -2.878703642933 | -2.149381424101 | 1.628666272813  |
| C  | -2.227330500316 | 4.543205135663  | 2.505070383961  |
| C  | -2.819528919686 | -3.831030925443 | -2.681164944564 |
| C  | -2.528760889731 | 1.991037392529  | 3.878030153475  |
| C  | -3.098826966510 | -3.880680088006 | 0.213748677083  |
| C  | -2.691193956605 | 0.684162292842  | 4.186001093506  |
| C  | -3.146947896446 | -3.565315339617 | 1.526303834419  |
| C  | -3.067768631817 | -2.203704920369 | 4.094835231466  |
| C  | -0.729813715095 | 3.485057424479  | -4.621142330924 |
| C  | -3.039186549173 | 3.085253082776  | -5.121636408055 |
| C  | -3.373791285597 | 5.057631983181  | 3.107930245198  |
| C  | -1.030005659615 | 5.242672700381  | 2.643931219375  |
| C  | -1.797638575244 | -4.778531876313 | -2.677064116794 |
| C  | -3.965153532181 | -4.089410203619 | -3.431671876885 |
| C  | -0.959069837078 | 4.209781475310  | -5.797231348442 |
| C  | -2.910984712561 | 3.811482268364  | -6.296987952140 |
| C  | -2.058724617790 | -3.026414688243 | 4.591874697530  |
| C  | -4.267542166226 | -2.119969752318 | 4.799049780124  |
| C  | -1.689880009939 | 4.375287610333  | -6.638776544460 |
| C  | -3.324633880570 | 6.240409492229  | 3.831712896732  |
| C  | -0.978346473308 | 6.424569843055  | 3.369106150507  |
| C  | -1.915604663408 | -5.953098811887 | -3.406397470487 |
| C  | -4.085978165539 | -5.264255706071 | -4.159932351165 |
| C  | -2.126149810499 | 6.927109089696  | 3.965305830272  |
| C  | -3.060797777069 | -6.199494048992 | -4.150204264876 |
| C  | -2.242321897533 | -3.745343046474 | 5.764438228058  |
| C  | -4.453834969428 | -2.839773493387 | 5.970566003123  |
| C  | -3.441082180606 | -3.654133053289 | 6.457340997249  |
| H  | -2.020422544393 | 4.970098606855  | -2.552257088180 |
| H  | -2.079176313107 | 0.445963251975  | -5.330149079301 |
| H  | -2.127520039821 | 5.594723714264  | 0.040044175974  |
| H  | -2.410917072396 | -2.131062043821 | -4.723646736137 |
| H  | -2.469386356076 | 2.824722613654  | 4.558451890255  |
| H  | -3.269052352716 | -4.843691379115 | -0.239217524351 |
| H  | -2.789732506414 | 0.246556593471  | 5.165968481874  |
| H  | -3.363932545553 | -4.220599805416 | 2.353988971290  |
| H  | 0.122837868909  | 3.355535569242  | -3.965036346942 |
| H  | -3.994247257682 | 2.649521602144  | -4.853207313630 |
| H  | -4.311085718411 | 4.524834324739  | 3.000091344997  |
| H  | -0.133053415526 | 4.850519032149  | 2.179212191306  |
| H  | -0.902667564716 | -4.586573795115 | -2.097028441155 |
| H  | -4.768292791545 | -3.362109817062 | -3.435971037639 |
| H  | 0.358702952322  | 4.645120760602  | -6.057125436938 |
| H  | -3.769315461661 | 3.939647345710  | -6.945956424411 |
| H  | -1.121857552799 | -3.097516206649 | 4.051982005668  |
| H  | -5.060698458671 | -1.488233943054 | 4.417139527310  |
| H  | -1.589131889597 | 4.942103909723  | -7.556650486051 |
| H  | -4.226928013431 | 6.628044917317  | 4.289873750075  |
| H  | -0.037849505817 | 6.953546947622  | 3.469490478087  |
| H  | -1.109461111487 | -6.672720458769 | -3.394335071570 |
| H  | -4.985913879600 | -5.450503829498 | -4.734153543379 |
| H  | -2.087190776654 | 7.850554390703  | 4.530678876883  |
| H  | -3.154498726844 | -7.116870379735 | -4.719017411483 |
| H  | -1.445389366564 | -4.377469103668 | 6.138210983551  |
| H  | 5.394971816153  | -2.766204457391 | 6.502697956716  |
| H  | -3.585923053185 | -4.216070421013 | 7.272310738999  |
| Zn | -2.185286554604 | 0.318483869682  | -0.065799226316 |
| C  | 7.043858661513  | 1.773642534872  | 1.616605018050  |
| C  | 8.438208546117  | 1.788571413832  | 1.642737920606  |
| C  | 9.168131821421  | 0.714839998258  | 1.123092873454  |
| C  | 8.539718217534  | -0.426910621343 | 0.667408685157  |
| C  | 6.335706768611  | 0.669642657532  | 1.165542429901  |
| C  | 9.237207326595  | -1.493872432314 | 0.025648519461  |
| C  | 8.587142306094  | -2.522516634412 | -0.597763692597 |
| C  | 7.161973759337  | -2.556110318608 | -0.707368997189 |
| C  | 6.465496695100  | -3.68581878358  | -1.092448964027 |
| C  | 5.069461345466  | -3.728310314472 | -1.057875462492 |
| C  | 4.334642223197  | -2.642706793020 | -0.578218354648 |
| C  | 4.943538876753  | -1.452230681275 | -0.221046152201 |
| C  | 4.237266873568  | -0.336530131432 | 0.365069939601  |
| C  | 4.924262893787  | 0.671939849355  | 1.007112197612  |
| C  | 7.062959428783  | -0.606202235424 | 0.871779245893  |
| C  | 6.423287445520  | -1.278355795667 | -0.426062844034 |
| C  | 6.852192032089  | -1.565505576568 | 2.078972876955  |
| C  | 6.638646661259  | -0.323764110432 | -1.636822253794 |
| H  | 6.493630320029  | 2.654956289529  | 1.929317213413  |
| H  | 10.247335934212 | 0.790761155218  | 1.041790079088  |
| H  | 7.021701225440  | -4.569546398198 | -1.386513654982 |
| H  | 3.264906621310  | -2.752952013519 | -0.453526061951 |
| H  | 8.958009754492  | 2.665460152404  | 2.007640685410  |
| H  | 4.553752545099  | -4.635386948222 | -1.347126895073 |
| H  | 10.322156316148 | -1.473701129308 | 0.037814181968  |
| H  | 9.153764071532  | -3.352021849781 | -1.005818516872 |
| H  | 4.377028608826  | 1.542466986596  | 1.351174869459  |
| H  | 7.361145992692  | -2.513631883850 | 1.906149248891  |
| H  | 5.789455768474  | -1.758668292484 | 2.229107618002  |
| H  | 7.700104196867  | -0.121946176183 | -1.781269180098 |
| H  | 6.120960340200  | 0.621146908704  | -1.473245406646 |
| H  | 7.259212746146  | -1.108083258566 | 2.981435769535  |
| H  | 6.242465216846  | -0.788899390853 | -2.540327675179 |
| C  | 2.766445525929  | -0.225146465091 | 0.265613198202  |
| C  | 2.086889739051  | -0.437352135873 | -0.935206403844 |
| C  | 1.995304514258  | 0.143161220774  | 1.368518421870  |
| C  | 0.716107198581  | -0.271038053761 | -0.982844542420 |
| H  | 2.625988932207  | -0.710329289162 | -1.832375457657 |
| C  | 0.626802854531  | 0.280952745392  | 1.232506919532  |
| H  | 2.458037954162  | 0.303392776334  | 2.333474636024  |
| N  | -0.011912754230 | 0.079706086575  | 0.079235450315  |
| H  | 0.166404184983  | -0.418014616402 | -1.904923156227 |
| H  | 0.005227287025  | 0.558607098224  | 2.075459993486  |

TD-CAM-B3LYP energy:

$E(S_2-Z)^* = -4633.598123$  a.u.

\* The Z state has crossed the Q states at its optimized geometry (see Fig. 8b).

**Figure ESI6.** Computed absorption spectrum of  $1_{c,model}$  at the TD-CAM-B3LYP/6-311G(d,p) level.

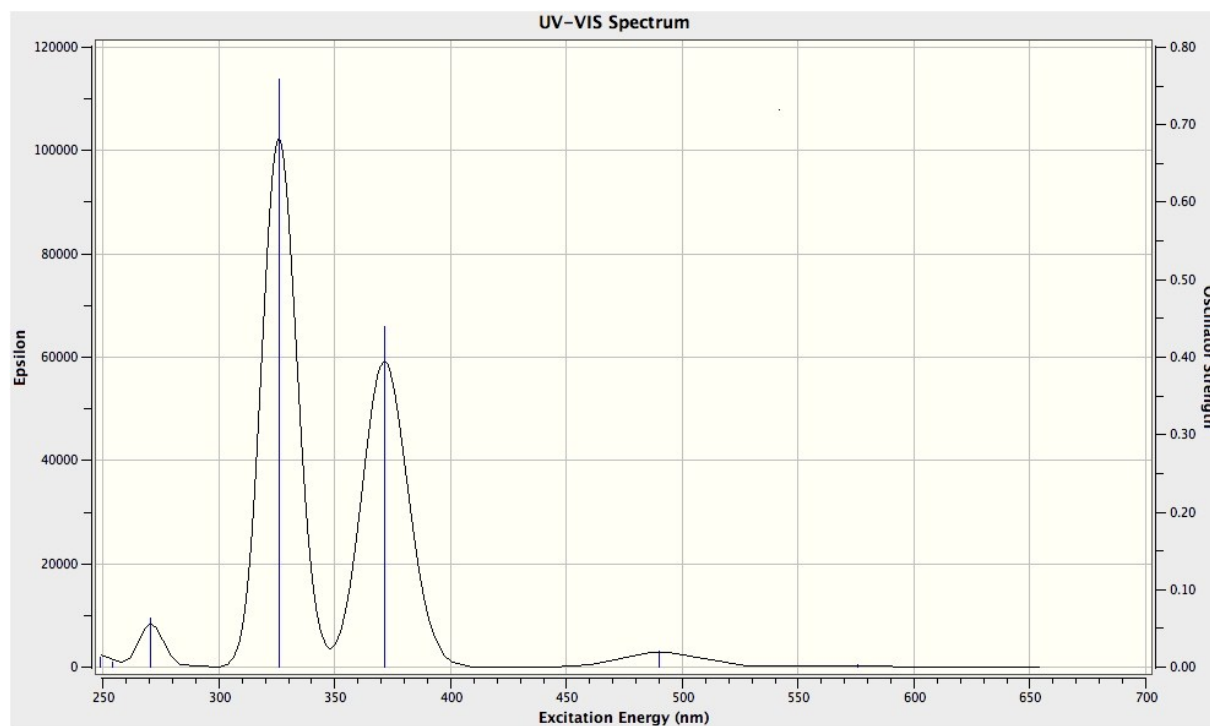

**Figure ESI 7.** Computed absorption spectrum of  $2_{c,model}$  at the TD-CAM-B3LYP/6-311G(d,p) level.

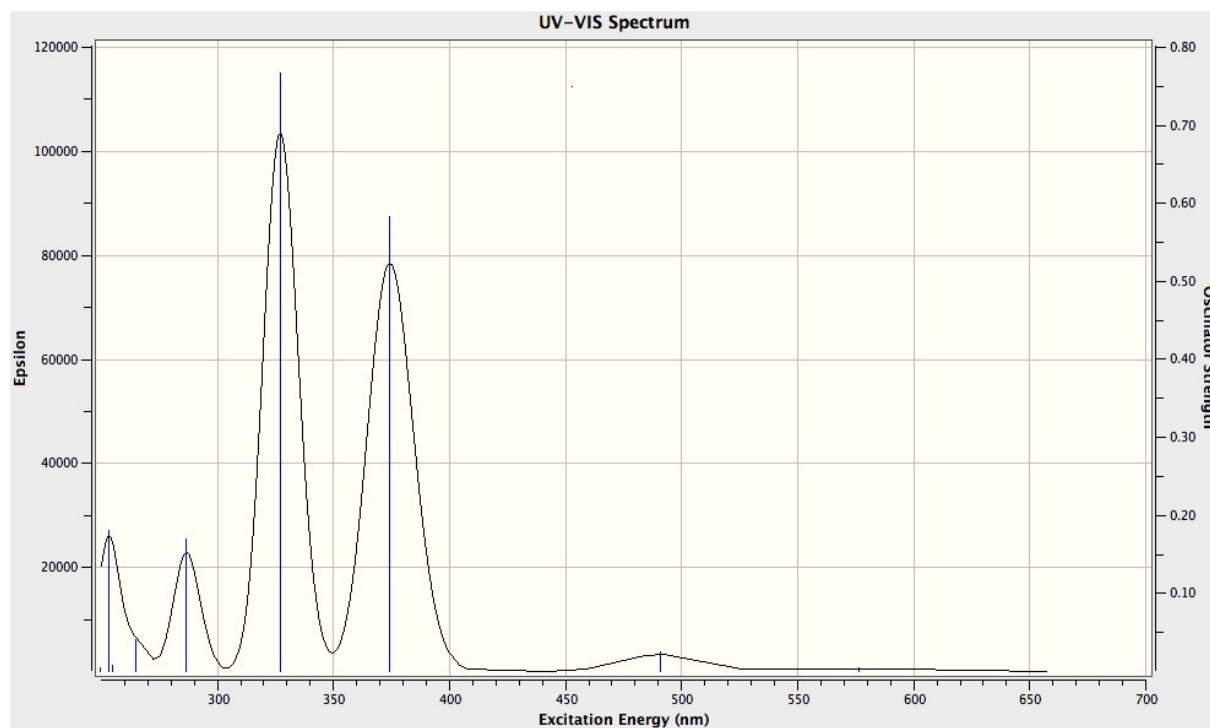

**Figure ESI8.** Computed absorption spectrum of  $3_c^+$ ,<sub>model</sub> at the TD-CAM-B3LYP/6-311G(d,p) level.

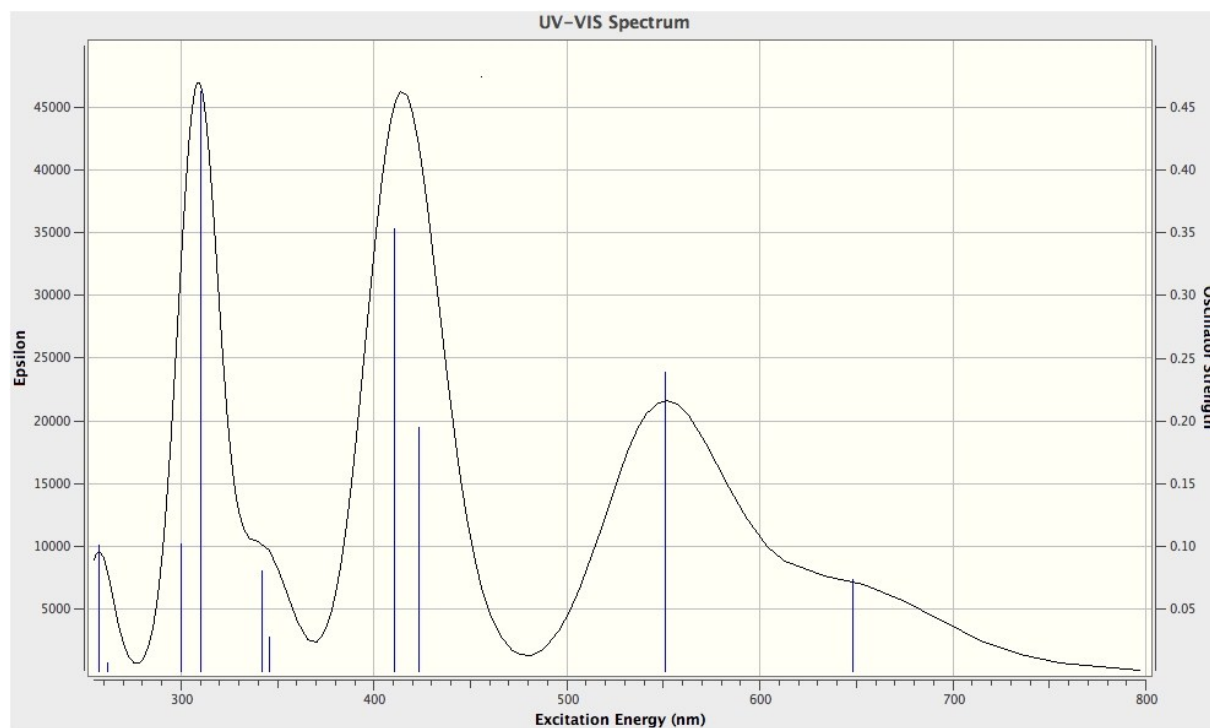



**Figure ESI9.** Computed absorption spectrum of  $\mathbf{1}_{c,model-Zn}$  at the TD-CAM-B3LYP/6-311G(d,p) level.

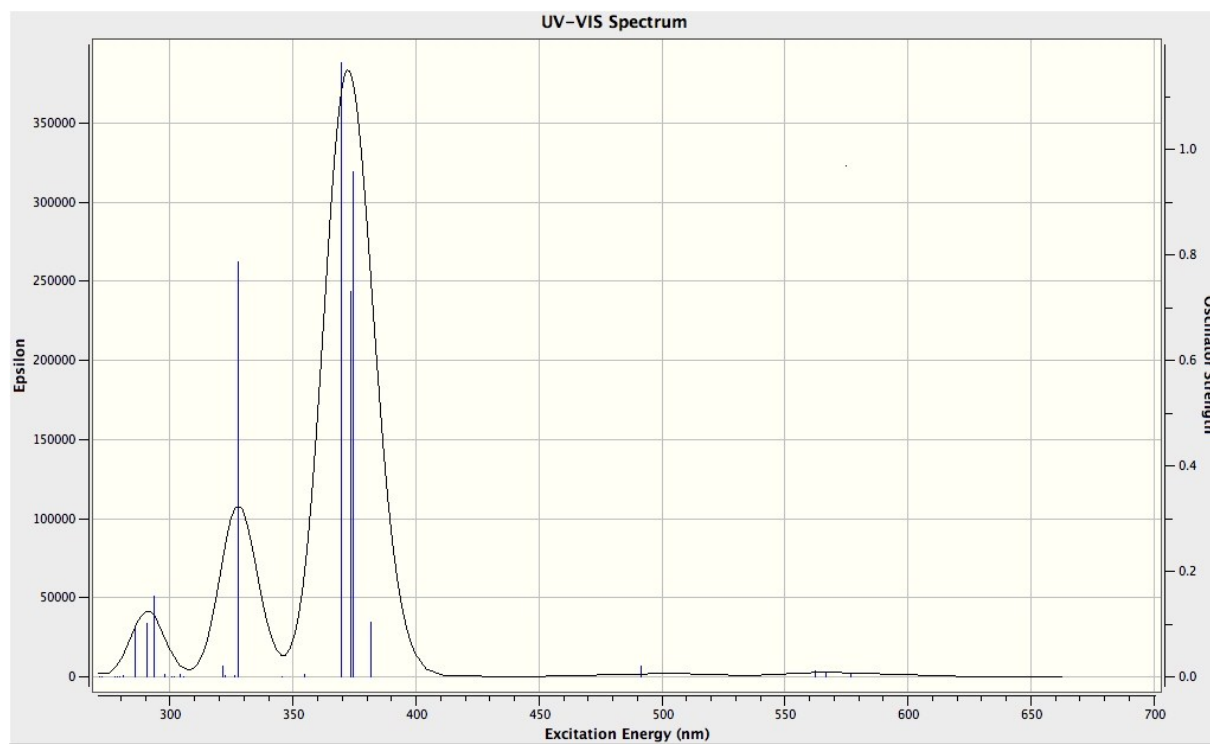

## 5. Photo-isomerisation quantum yield

Potassium ferrioxalate actinometer was used as a primary standard to determine the photoisomerisation quantum yield of this secondary standard,  $\phi_{c/o} = 1.4 \cdot 10^{-3}$ .

The change in absorption upon irradiation at 480 nm (band-pass filter) during specific time periods for 2,7-di-*t*-butyl-trans-10b,10c-dimethyl-10b,10c-dihydropyrene was compared to the change in absorption for the actinometer irradiated at the same wavelength. The monitoring wavelengths were 235, 476, and 643 nm for 2,7-di-*t*-butyl-trans-10b,10c-dimethyl-10b,10c-dihydropyrene. The compounds were dissolved in acetonitrile; the concentration was such that the absorbance at 480 nm was higher than 1.9. The solution of the primary actinometer was 0.15 M in a 0.05 M H<sub>2</sub>SO<sub>4</sub> aqueous solution. After each irradiation, 8  $\mu$ L of the irradiated solution was placed into a 2 mL volumetric flask. A 100  $\mu$ L amount of sodium acetate buffer solution (pH = 3.5) and 16  $\mu$ L of 0.01 M 1,10-phenanthroline aqueous solution were then added, and the volume was completed with distilled water. The photoreduction of the actinometer was followed at 510 nm. The absorption spectra for each compound were recorded after each irradiation time without further handling, and the total time was such that the isomerization of the compound was less than 10%. The ring-opening quantum yields  $\phi_x$  were calculated according to classical equations reminded in the experimental part.
